# Supplementary material for: Synthesis, spectroscopic findings and crystal engineering of Pb(ii)–Salen coordination polymers, and supramolecular architectures engineered by σ-hole/spodium/tetrel bonds: a combined experimental and theoretical investigation
Source: PubMed Central journal article supplement — RSC Adv. 2022 Feb 24;12(10):6352–63. doi: 10.1039/d1ra09346k (PMC8982041; doi:10.1039/d1ra09346k), 2022-02-24
Supplement: RA-012-D1RA09346K-s002.pdf [file RA-012-D1RA09346K-s002.pdf]

**Synthesis, Spectroscopic Findings, Crystal Engineering of Pb(II)-Salen Coordination Polymers, and Supramolecular Architectures Engineered by  $\sigma$ -hole/Spodium/Tetrel bonds: A Combined Experimental and Theoretical Investigations**

Dhrubajyoti Majumdar <sup>a\*,b</sup>, A. Frontera <sup>c</sup>, Rosa M. Gomila <sup>c</sup>, Sourav Das <sup>d</sup>, Kalipada Bankura<sup>a</sup>

<sup>a</sup>Department of Chemistry, Tamralipta Mahavidyalaya, Tamluk 721636, West Bengal, India

<sup>b</sup>Department of Chemistry, Indian Institute of Technology (Indian School of Mines), Dhanbad, Jharkhand 826004, India

<sup>c</sup>Department de Química, Universitat de les Illes Balears, Cra. de Valldemossa km 7.5. 07122 Palma de Mallorca (Balears), Spain

<sup>d</sup>Department of Basic Sciences, Chemistry Discipline; Institute of Infrastructure Technology Research and Management; Near Khokhara Circle, Maninagar East, Ahmedabad-380026, Gujarat, India

CORRESPONDING AUTHOR EMAIL: [dmajumdar30@gmail.com](mailto:dmajumdar30@gmail.com)

| Captions                                                                                                                                | Schemes/Tables/Figures |
|-----------------------------------------------------------------------------------------------------------------------------------------|------------------------|
| Generation of polymeric complexes in the presence of pseudohalides bridging ligand.                                                     | <b>Scheme S1</b>       |
| Salen ligand (H <sub>3</sub> L) compartment mobility (N <sub>2</sub> O <sub>2</sub> vs O <sub>4</sub> ) with M <sup>2+</sup> metal ion. | <b>Scheme S2A</b>      |

|                                                                                                                                      |                   |
|--------------------------------------------------------------------------------------------------------------------------------------|-------------------|
| Salen ligands ( $H_2L^1/H_2L^2$ ) with different nature ( $M/M^1$ ) metal ions occupancy led to heteronuclear complex formation.     | <b>Scheme S2B</b> |
| Salen ligand ( $H_3L$ ) compartment occupancy by different metal ions ( $M^1/M^2$ ) facilitated the heteronuclear complex formation. | <b>Scheme S2C</b> |
| The simplified Holo-/Hemi-directed coordination spheres around the Pb(II) metal ion.                                                 | <b>Scheme S3</b>  |
| NMR proton numbering Scheme of $H_3L$ .                                                                                              | <b>Scheme S4</b>  |
| Coordination polyhedral in Pb(II) complexes with donor ligands.                                                                      | <b>Scheme S5</b>  |
| Selected important bond distances ( $\text{\AA}$ ) and Bond angles ( $^\circ$ ) for the heteronuclear CP.                            | <b>Table S1</b>   |
| Reported X-ray characterized Holo-/Hemi-directed heteronuclear Pb(II) complexes.                                                     | <b>Table S2</b>   |
| Reported Covalent and Tetrel bond lengths ( $\text{\AA}$ ) in the structures of Pb(II) complexes.                                    | <b>Table S3</b>   |
| MALDI-TOF Mass of the CP                                                                                                             | <b>Fig.S1</b>     |
| Representative FT-IR spectra for Salen ligand and CP.                                                                                | <b>Fig.S1A</b>    |
| Representative Raman spectra for the CP.                                                                                             | <b>Fig.S2</b>     |
| Representative UV-Vis spectra for Salen ligand.                                                                                      | <b>Fig.S3</b>     |
| Representative UV-Vis spectra for CP                                                                                                 | <b>Fig.S4</b>     |
| Representative $^1H$ NMR spectra for Salen ligand.                                                                                   | <b>Fig.S5</b>     |
| Representative $^{13}C$ NMR spectra for Salen ligand.                                                                                | <b>Fig.S6</b>     |
| Representative $^1H$ NMR spectra for the CP.                                                                                         | <b>Fig.S7</b>     |
| Representative PXRD pattern for the CP                                                                                               | <b>Fig.S8</b>     |
| The perspective view of the asymmetric unit of the CP.                                                                               | <b>Fig.S9</b>     |
| Histogram plots of Cd-NC (left) and Cd-SC (right) angles in Cd-NCS and Cd-SCN complexes.                                             |                   |

---

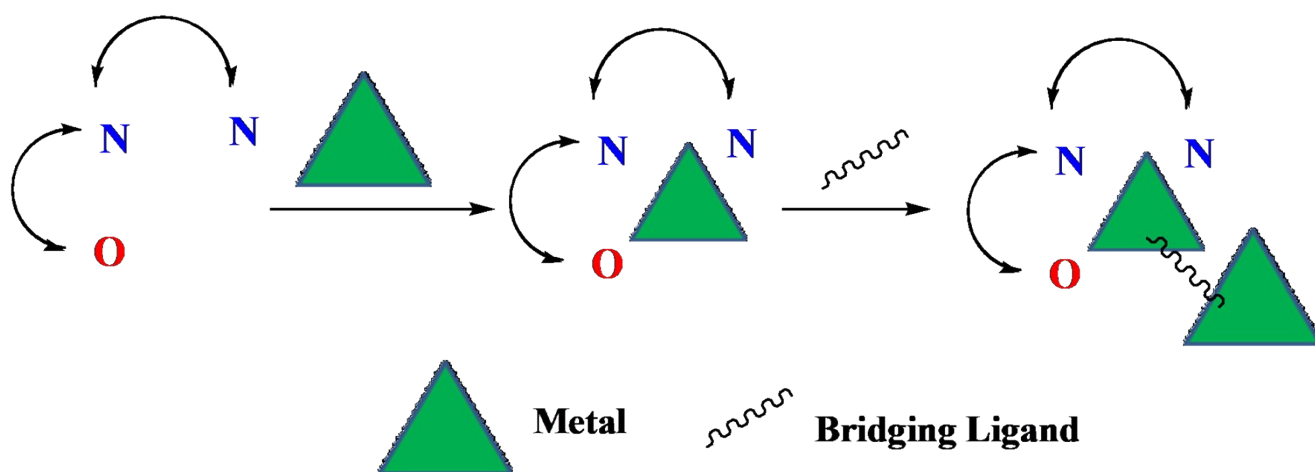

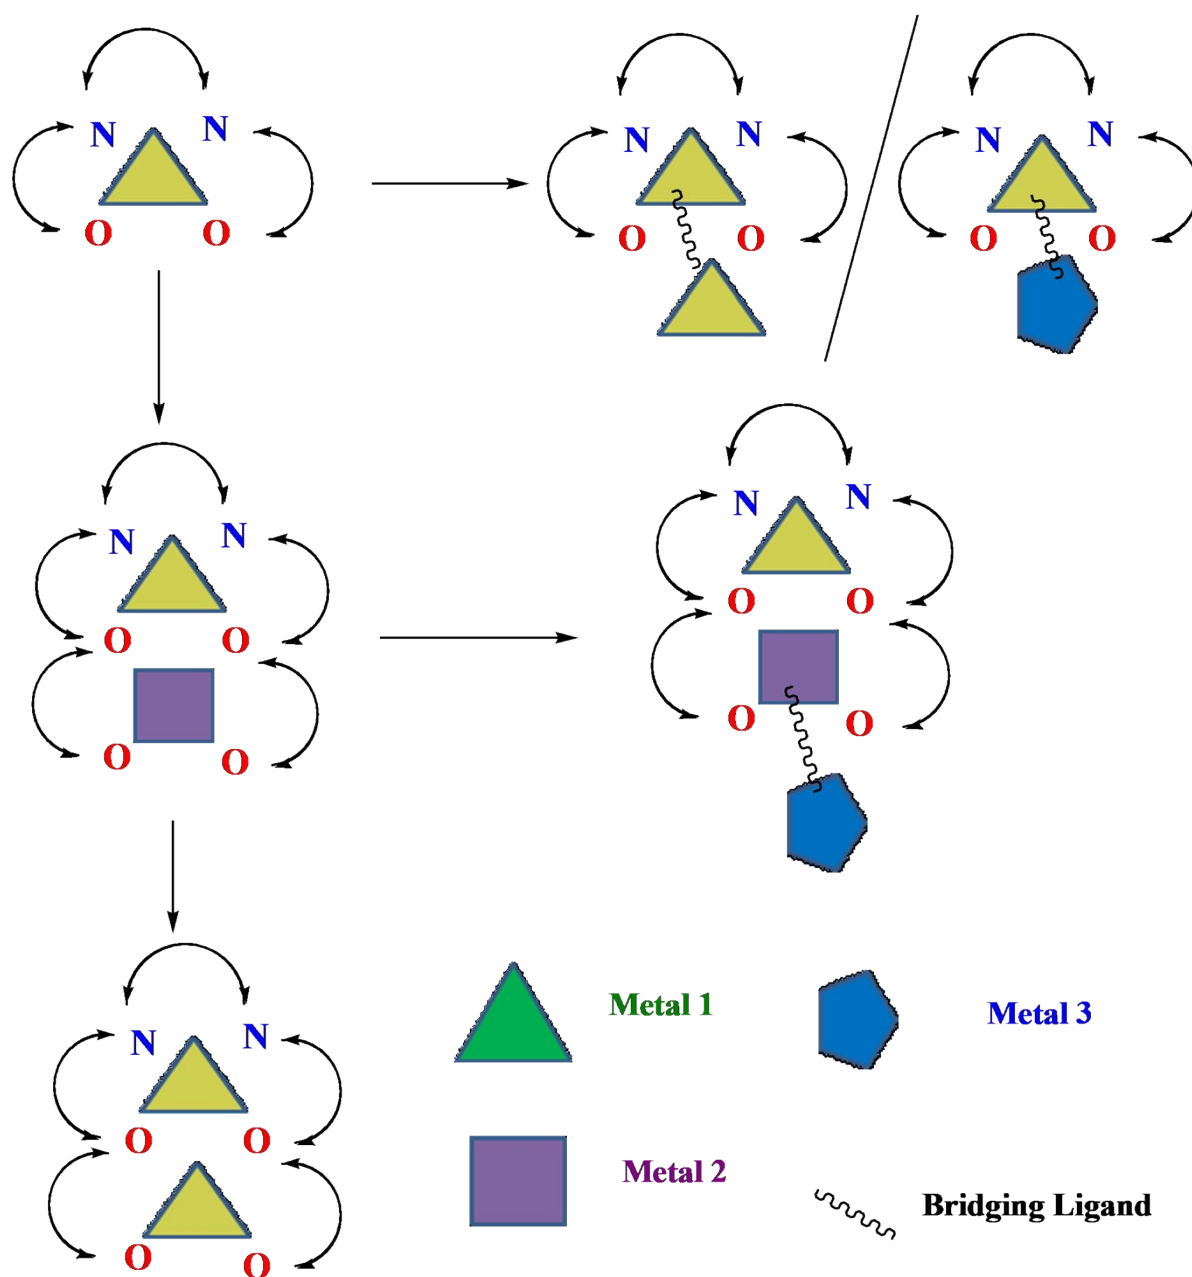

**Scheme S1.** Generation of polynuclear complexes in the presence of pseudohalides bridging ligand.

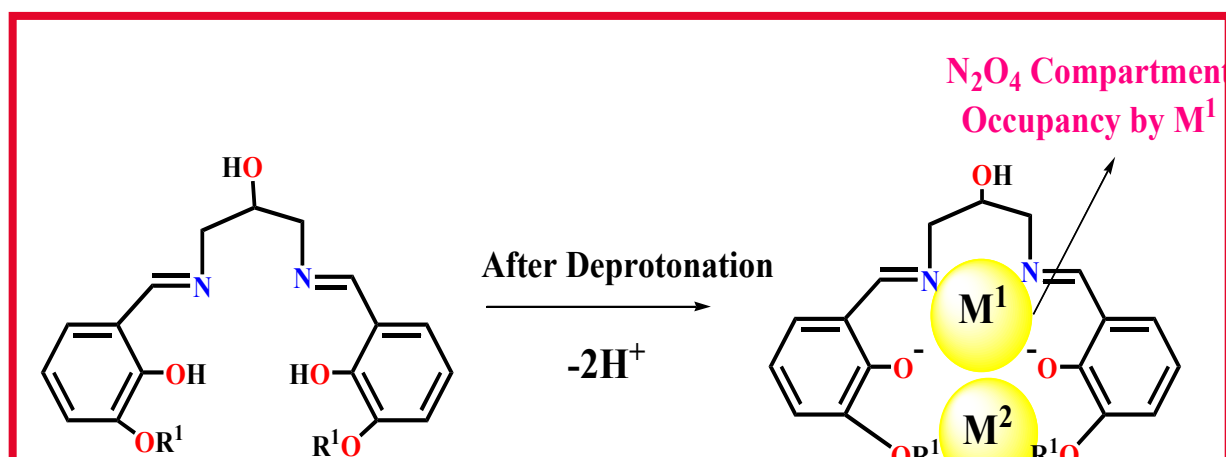

**Scheme S2A.** Salen ( $H_3L$ ) compartment mobility ( $N_2O_2$  vs  $O_4$ ) with  $M^{2+}$  metal ion.

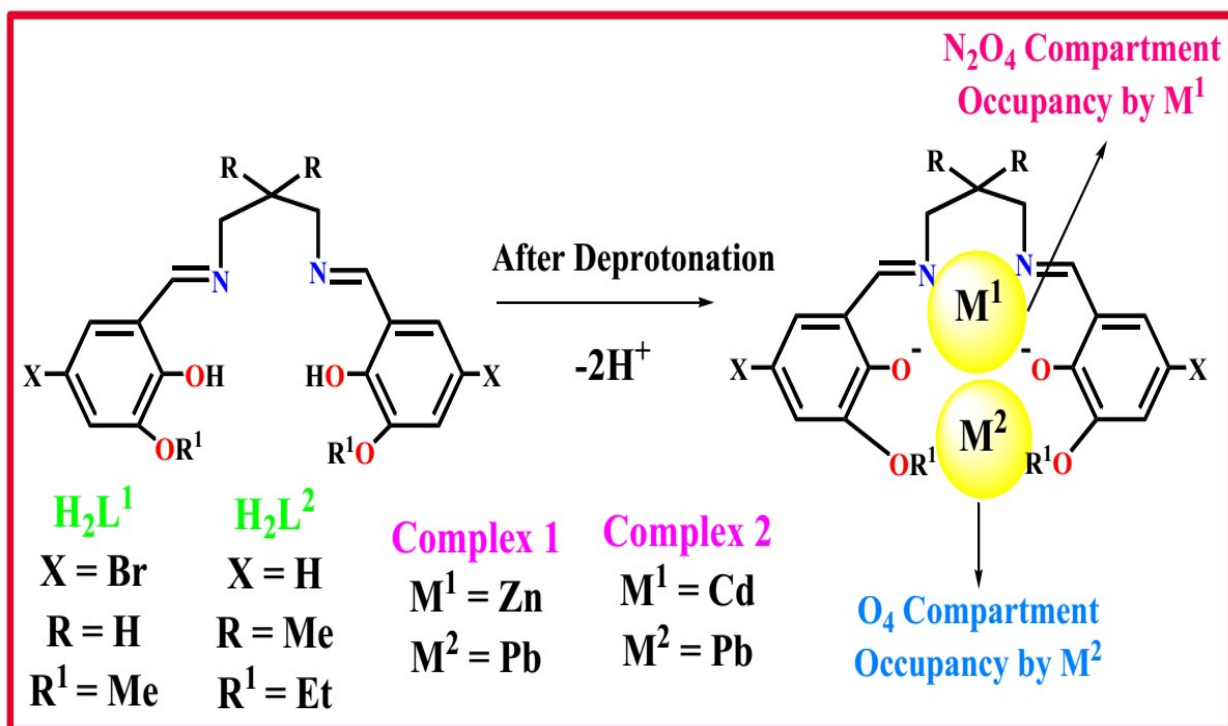

**Scheme S2B.** Salen ligands ( $H_2L^1/H_2L^2$ ) compartment occupancy by different metal ions

(M<sup>I</sup>/M<sup>II</sup>) facilitated the heteronuclear complex formation.

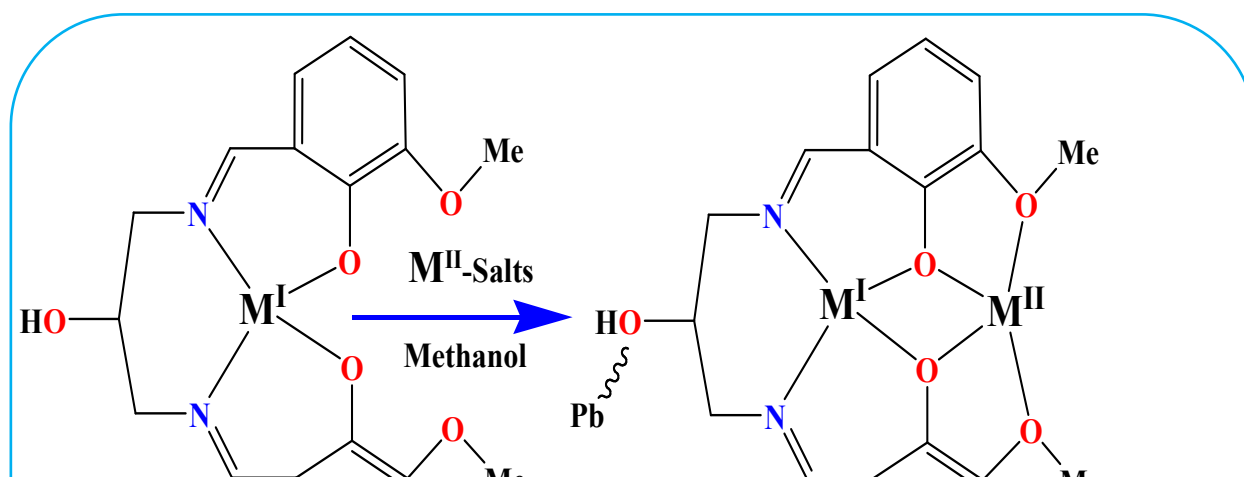

**Scheme S2C.** H<sub>3</sub>L compartment occupancy by different metal ions (M<sup>1</sup>/M<sup>2</sup>) facilitated the heteronuclear CP formation.

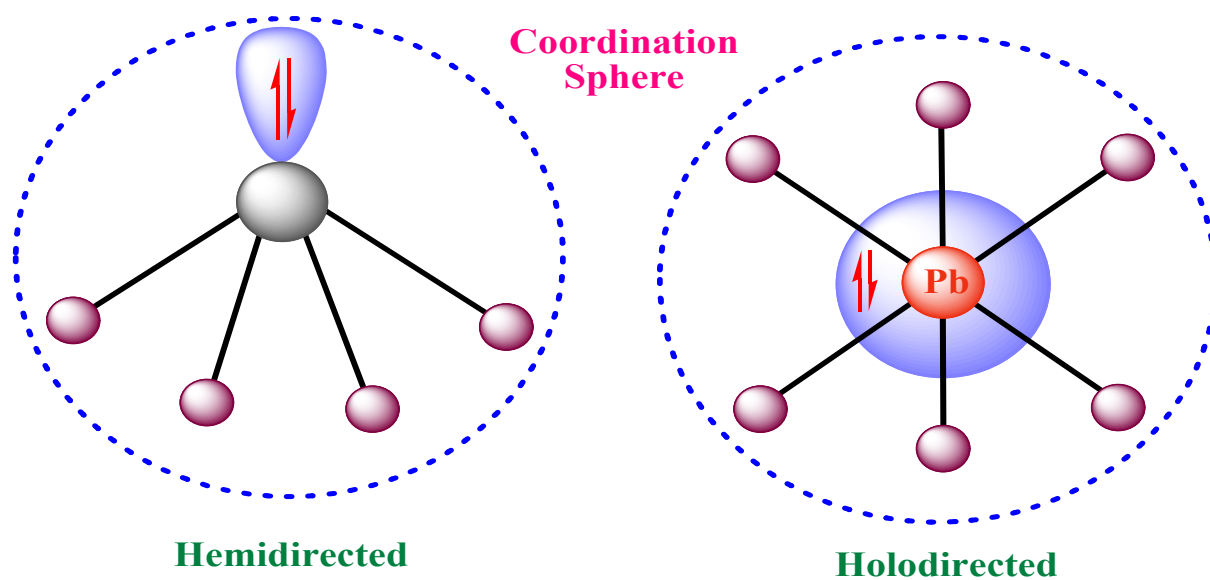

**Scheme S3.** The simplified Holo-directed and Hemi-directed coordination spheres around the Pb(II) metal ion.

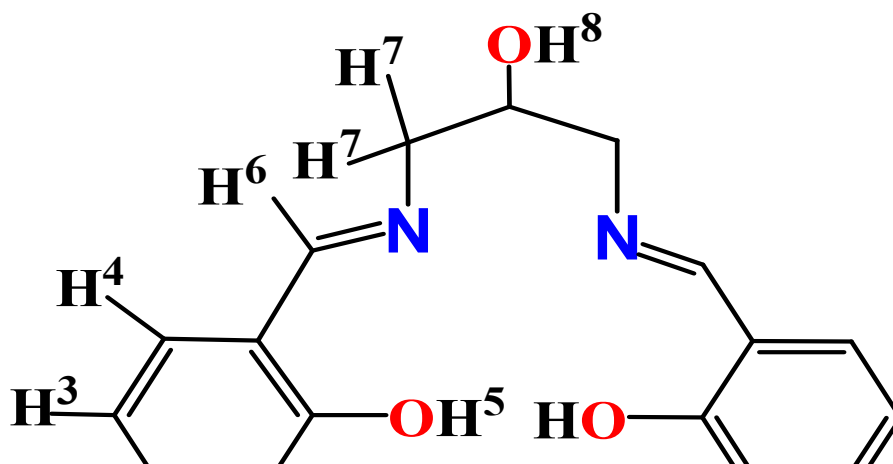

**Scheme S4.**  $^1\text{H}$  NMR Proton numbering Scheme of  $\text{H}_3\text{L}$ .

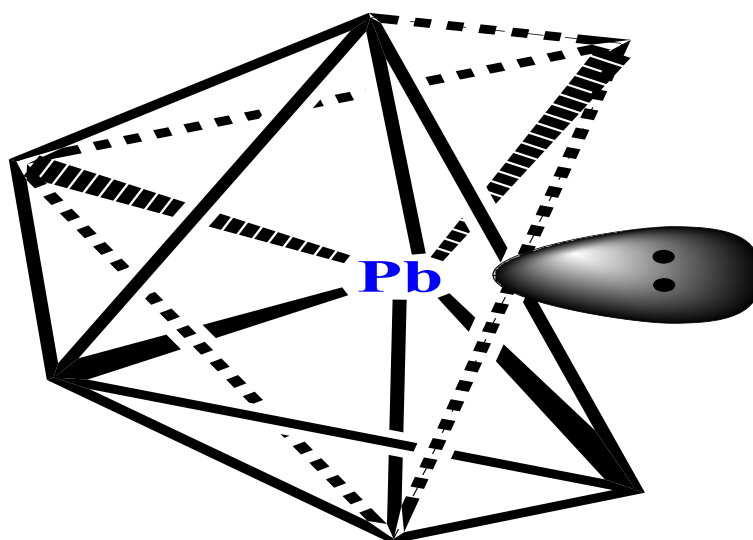

**Scheme S5.** Coordination polyhedral in  $\text{Pb}(\text{II})$  complexes with donor ligands. For complexes with composition  $\text{AX}_6\text{LP}$  (CN A (6+LP)) the VSEPR model suggests the shape of a pentagonal bipyramid with the lone pair occupying the axial position or distorted octahedron geometry lone pair occupying capped position.

**Table S1** Selected important bond distances ( $\text{\AA}$ ) and Bond angles ( $^\circ$ ) for the CP.

| Bond distances ( $\text{\AA}$ ) |                 |                 |
|---------------------------------|-----------------|-----------------|
| Pb1 S1 2.883(6)                 | Pb1 O2 2.420(6) | Pb1 O3 2.379(6) |
| Pb1 O1 2.710(7)                 | Pb1 O4 2.694(7) | Cd1 O2 2.235(6) |
| Cd1 O3 2.241(6)                 | Cd1 N3 2.12(8)  | Cd1 N1 2.253(7) |
| Cd1 N2 2.253(8)                 |                 |                 |



| Bond angles (°)     |                    |                    |                    |
|---------------------|--------------------|--------------------|--------------------|
| O2 Pb1 S1 86.6(1)   | O2 Pb1 O1 60.9(2)  | O2 Pb1 O4 132.8(2) | O3 Pb1 S1 88.7(1)  |
| O3 Pb1 O2 71.0(2)   | O3 Pb1 O1 131.9(2) | O3 Pb1 O4 62.1(2)  | O1 Pb1 S1 88.4(1)  |
| O1 Pb1 O4 165.3(2)  | O4 Pb1 S1 97.3(1)  | O2 Cd1 O3 77.0(2)  | O2 Cd1 N3 110.2(3) |
| O2 Cd1 N1 85.2(2)   | O2 Cd1 N2 143.6(2) | O3 Cd1 N3 109.0(3) | N1 Cd1 O3 140.8(2) |
| N1 Cd1 N3 109.9(2)  | N1 Cd1 N2 90.8(3)  | N2 Cd1 O3 83.1(3)  | N2 Cd1 N3 105.2(2) |
| Cd1 O3 Pb1 106.0(2) |                    |                    |                    |

**Table S2** Reported X-ray characterized Holo-/Hemi directed heteronuclear Pb(II) complexes.

| Complexes                                       | Coordination mode | Tetrel bonding | Ref |
|-------------------------------------------------|-------------------|----------------|-----|
| [Pb(OAc)(NiL <sup>1</sup> ) <sub>2</sub> ](OAc) | Holo-directed     | Not explored   | 1   |

|                                                                                                      |                |              |           |
|------------------------------------------------------------------------------------------------------|----------------|--------------|-----------|
| [NiL <sup>2</sup> (H <sub>2</sub> O) <sub>2</sub> PbBr <sub>2</sub> ]                                | Hemi-directed  | Not explored | 2         |
| [NiL <sup>2</sup> (H <sub>2</sub> O) <sub>2</sub> Pb(NO <sub>3</sub> ) <sub>2</sub> ]                | √              | Not explored | 2         |
| {L <sup>3</sup> Ni}Pb(NC <sub>5</sub> H <sub>5</sub> )Cl] <sub>2</sub>                               | √              | Not explored | 3         |
| [{L <sup>4</sup> Ni} <sub>2</sub> Pb](H <sub>2</sub> O)(Py)                                          | √              | Not explored | 3         |
| {[NiL <sup>5</sup> (py) <sub>2</sub> ]PbCl <sub>2</sub> }(Py)                                        | √              | Not explored | 4         |
| [NiL <sup>6</sup> Pb(NO <sub>3</sub> ) <sub>2</sub> ]                                                | √              | Not explored | 5         |
| [PbNiL <sup>7</sup> (AcO) <sub>2</sub> ]                                                             | √              | Not explored | 6         |
| [(H <sub>2</sub> O)Ni(SCN)L <sup>8</sup> Pb(OAc)].DMSO                                               | √              | Present      | 7         |
| [(H <sub>2</sub> O) <sub>2</sub> NiL <sup>9</sup> PbCl <sub>2</sub> ]                                | √              | Present      | 7         |
|                                                                                                      |                |              | 7         |
| [(SCN)NiL <sup>9</sup> Pb(NO <sub>3</sub> )]                                                         | √              | Absent       | 7         |
| [(H <sub>2</sub> O)Ni(SCN)L <sup>10</sup> PbCl]                                                      | √              | Absent       | 7         |
| [(NCS)(H <sub>2</sub> O)NiLPb(DMF)Cl]                                                                | No information | Not explored | 8         |
| [(SCN)NiL <sup>1</sup> (μ <sub>1,3</sub> -NCS)Pb]                                                    | No information | No explored  | 9         |
| [(SCN)NiL <sup>1</sup> (μ -OAc)Pb]                                                                   |                |              |           |
| [(SCN)NiL <sup>2</sup> (μ -OAc)Pb]                                                                   |                |              |           |
| [{(DMSO)(H <sub>2</sub> O)NiL <sup>1</sup> } <sub>2</sub> Pb](ClO <sub>4</sub> ) <sub>2</sub>        |                |              |           |
| [{(DMSO)(H <sub>2</sub> O)NiL <sup>2</sup> } <sub>2</sub> Pb](ClO <sub>4</sub> ) <sub>2</sub> ·4DMSO |                |              |           |
| [(Cd)(Pb)(L)(η <sup>1</sup> -NCS)(η <sup>1</sup> -SCN)] <sub>n</sub> ( <b>1</b> )                    | Hemi-directed  | Explored     | This work |

**Table S3** Reported Covalent and Tetrel bond lengths (Å) in the structures of Pb(II) complexes.

| Complexes                                               | Bond lengths (Å) |                   | Bond Nature | Ref |
|---------------------------------------------------------|------------------|-------------------|-------------|-----|
| [PbL]ClO <sub>4</sub> ] <sub>n</sub> ·nH <sub>2</sub> O | Pb-N             | 2.408(4)-2.513(4) | Covalent    | 10  |
|                                                         |                  | 2.934(4)          | Tetrel      |     |
|                                                         | Pb-O             | 2.382(4)          | Covalent    |     |

|                                                                                         |                               |                   |          |           |
|-----------------------------------------------------------------------------------------|-------------------------------|-------------------|----------|-----------|
|                                                                                         | ClO <sub>4</sub> <sup>-</sup> | 3.201(5)          | Tetrel   |           |
| {[Pb(HL)(OAc)]ClO <sub>4</sub> } <sub>n</sub>                                           | Pb-N                          | 2.612(6)-2.755(7) | Covalent | 10        |
|                                                                                         | Pb-O                          | 2.572(5)-2.515(6) | Covalent |           |
|                                                                                         | ClO <sub>4</sub> <sup>-</sup> | 3.047(7)          | Tetrel   |           |
| [PbL(NO <sub>2</sub> )] <sub>n</sub>                                                    | ClO <sub>4</sub> <sup>-</sup> | 3.309(10)         | Tetrel   |           |
|                                                                                         | Pb-N                          | 2.452(4)-2.837(3) | Covalent | 10        |
|                                                                                         |                               | 3.436(4)          | Tetrel   |           |
|                                                                                         | Pb-O                          | 2.384(5)-2.904(5) | Covalent |           |
| [PbLN <sub>3</sub> ] <sub>n</sub>                                                       |                               | 3.299(4)          | Tetrel   |           |
|                                                                                         | Pb-N                          | 2.571(3)-2.837(3) | Covalent | 10        |
|                                                                                         |                               | 3.436(4)          | Tetrel   |           |
| [Pb <sub>2</sub> (HL) <sub>2</sub> (NO <sub>3</sub> ) <sub>2</sub> (NCS) <sub>2</sub> ] | N <sub>3</sub> <sup>-</sup>   | 2,321(3)-2.883(3) | Covalent |           |
|                                                                                         | Pb-O                          | 2.335(3)          | Covalent |           |
|                                                                                         | Pb-N                          | 2.663(3)-2.460(4) | Covalent | 10        |
|                                                                                         | Pb-O                          | 2.555(2)-2.882(2) | Covalent |           |
| [PbL(OAc)] <sub>2</sub>                                                                 | Pb-S NCS <sup>-</sup>         | 3.2246(11)        | Tetrel   |           |
|                                                                                         | Pb-N                          | 2.490(3)-2.613(4) | Covalent | 10        |
|                                                                                         |                               | 3.030(4)-3.489(3) | Tetrel   |           |
| [(Cd)(Pb)(L)(η <sup>1</sup> -NCS)(η <sup>1</sup> SCN)] <sub>n</sub> ( <b>1</b> )        | Pb-O                          | 2.383(3)-2.753(4) | Covalent |           |
|                                                                                         | Pb-N                          | 2.697             | Covalent | This work |
|                                                                                         | Pb-O                          | 2.697(13)         | Covalent |           |
|                                                                                         | Pb-S SCN                      | 3.337             | Tetrel   |           |

File Name C:\SAIF Kochi\Dhrubaj, WB\SA-13\0\_B23\1

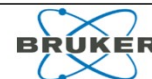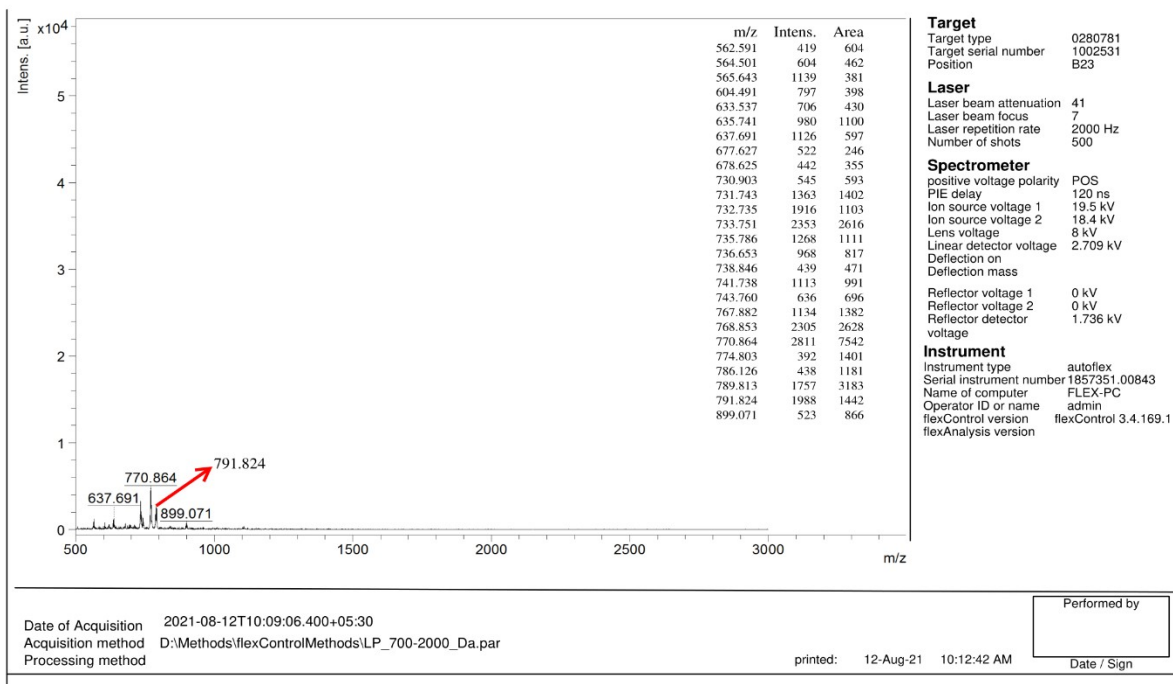

Fig.S1MALDI-TOF Mass of the CP.

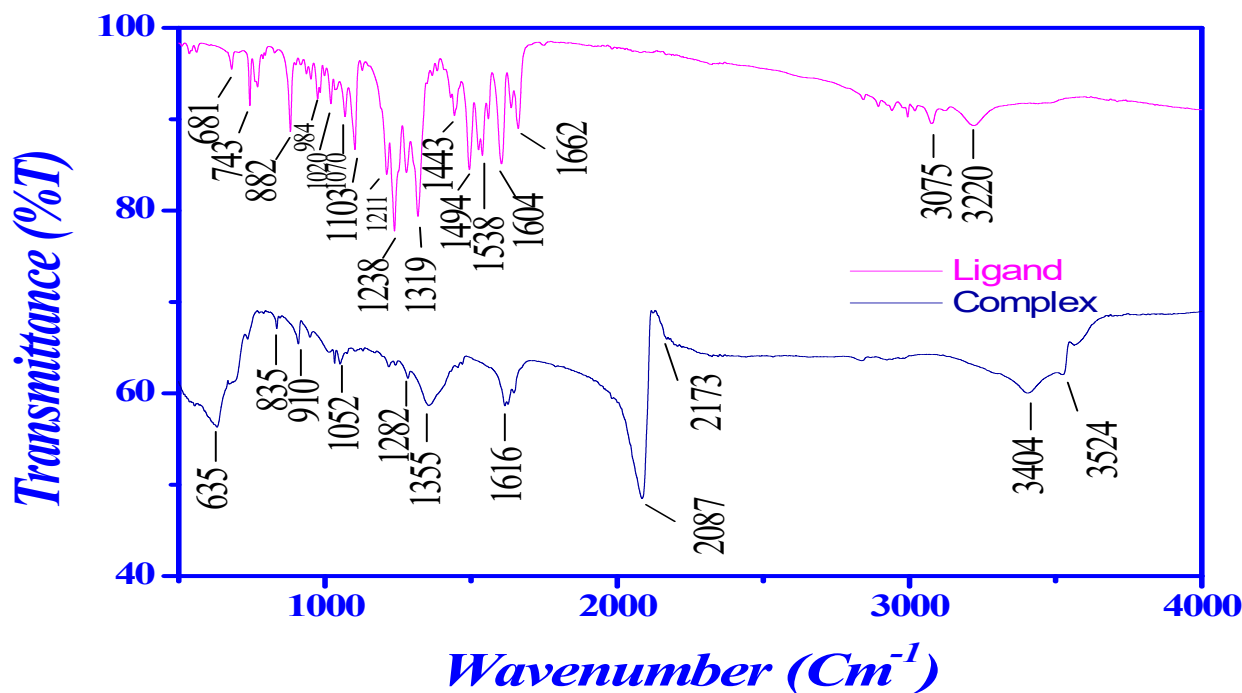

Fig.S1A Representative FT-IR spectra for Salen ligand and CP.

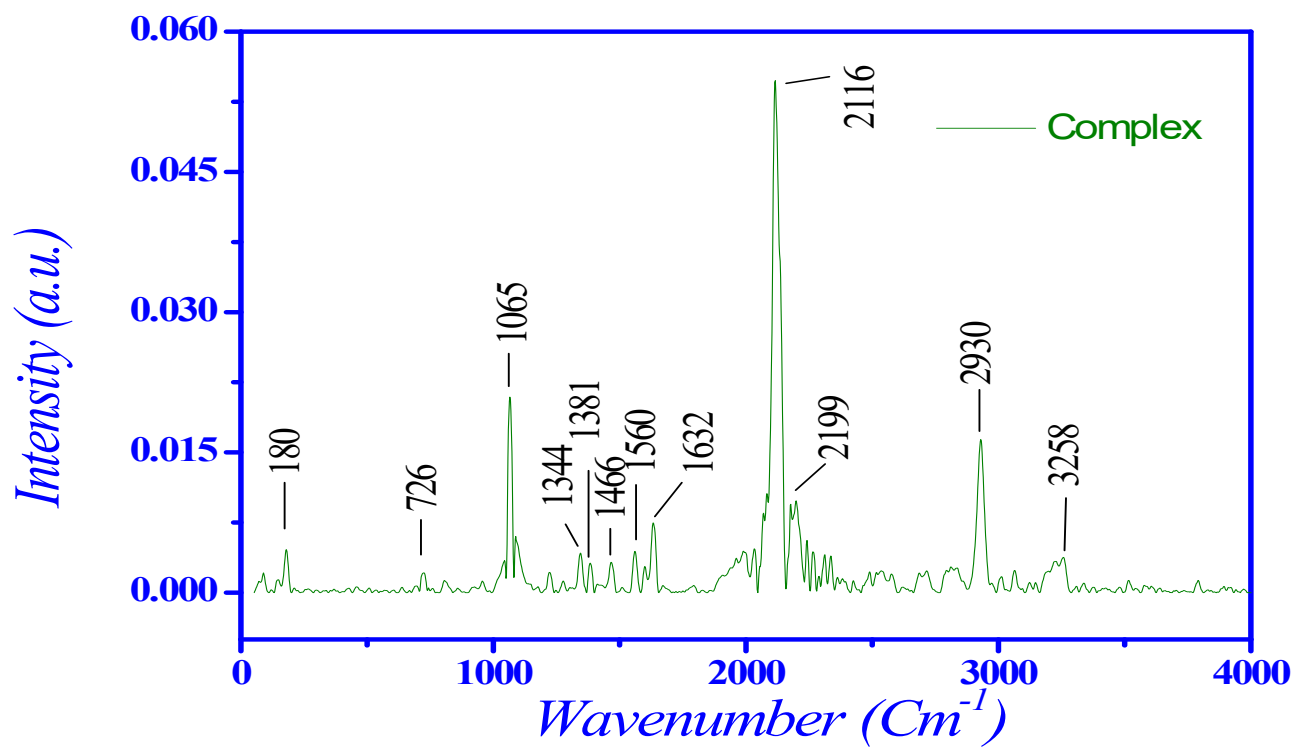

Fig.S2 Representative Raman spectra for the CP.

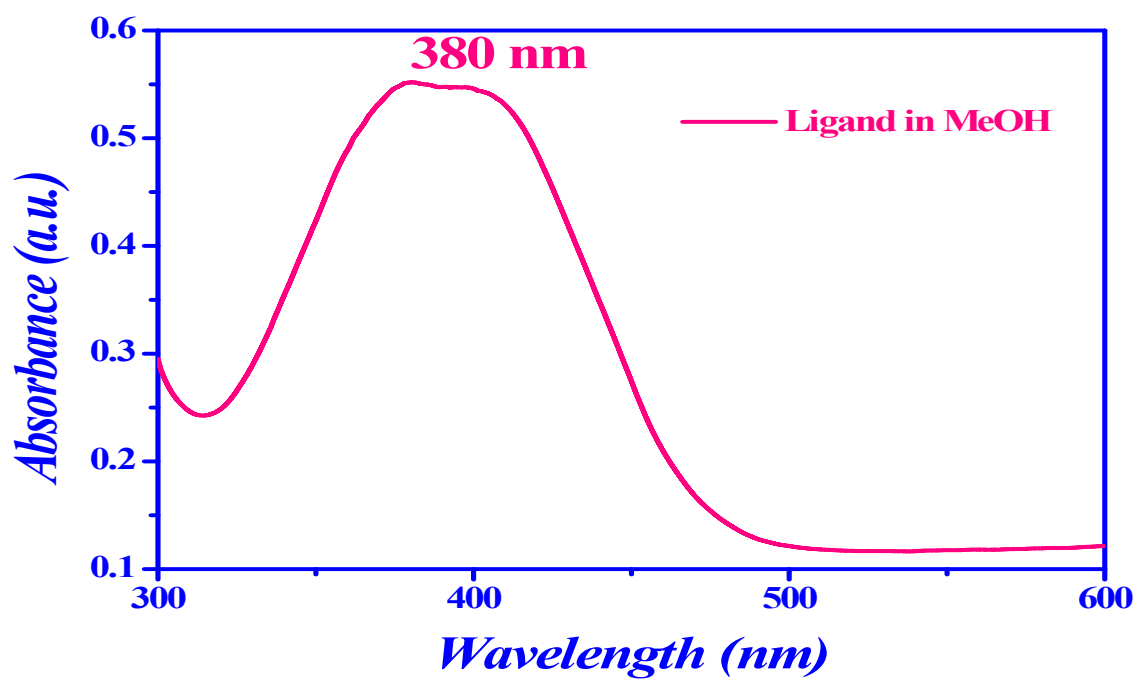

Fig.S3 Representative UV-Vis spectra for Ligand.

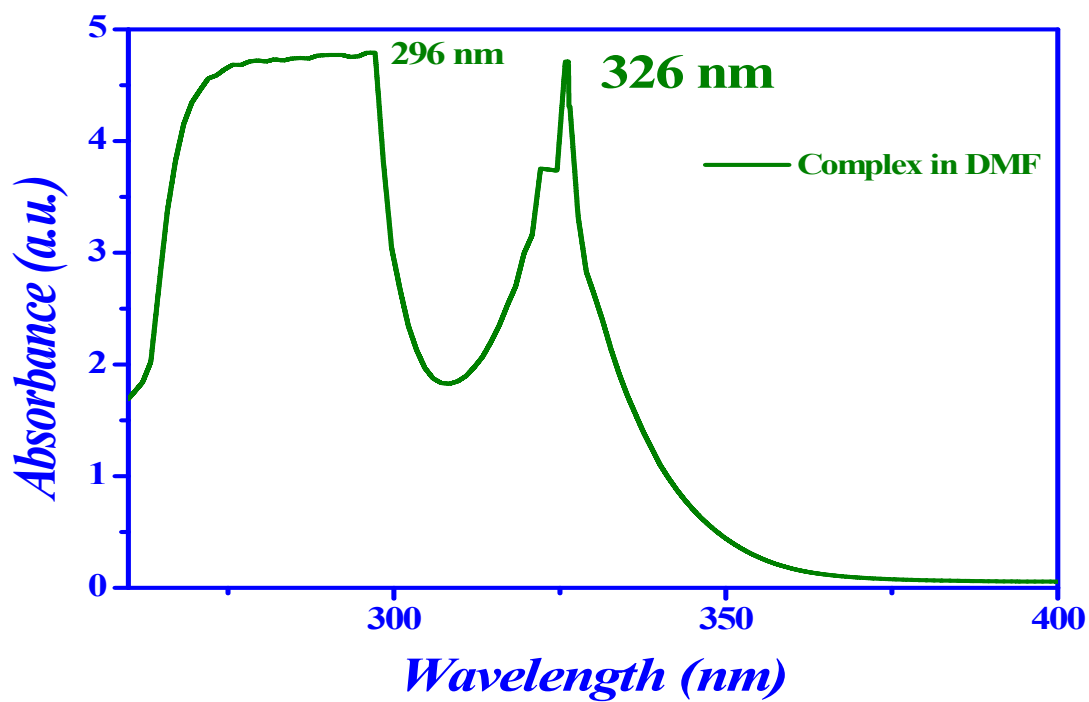

Fig.S4 Representative UV-Vis spectra for CP.

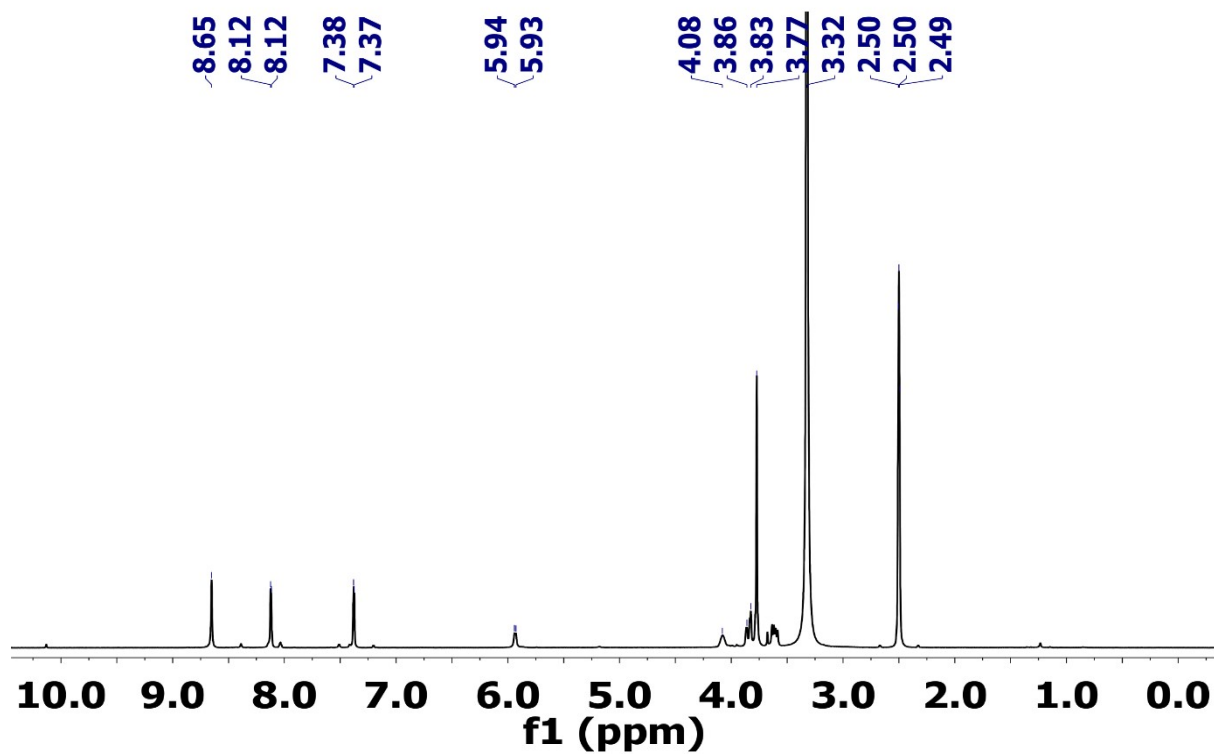

Fig.S5 Representative <sup>1</sup>H NMR spectra for Salen ligand.

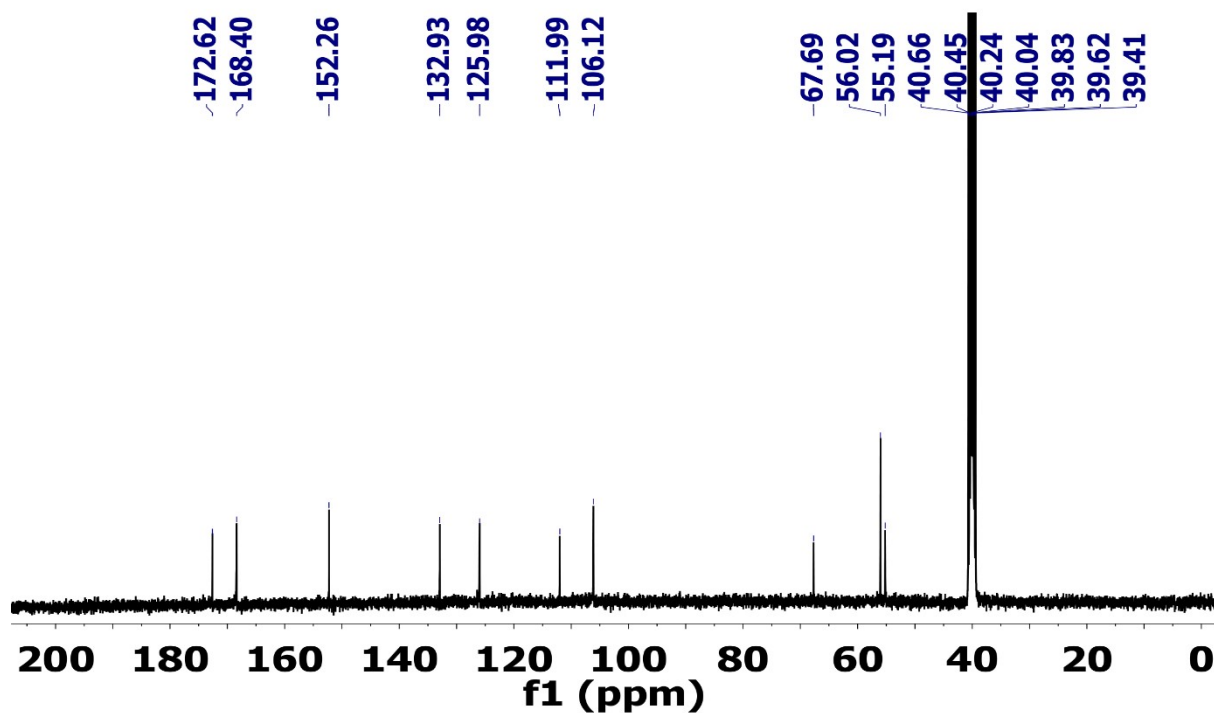Fig.S6 Representative  $^{13}\text{C}$  NMR spectra for Salen ligand.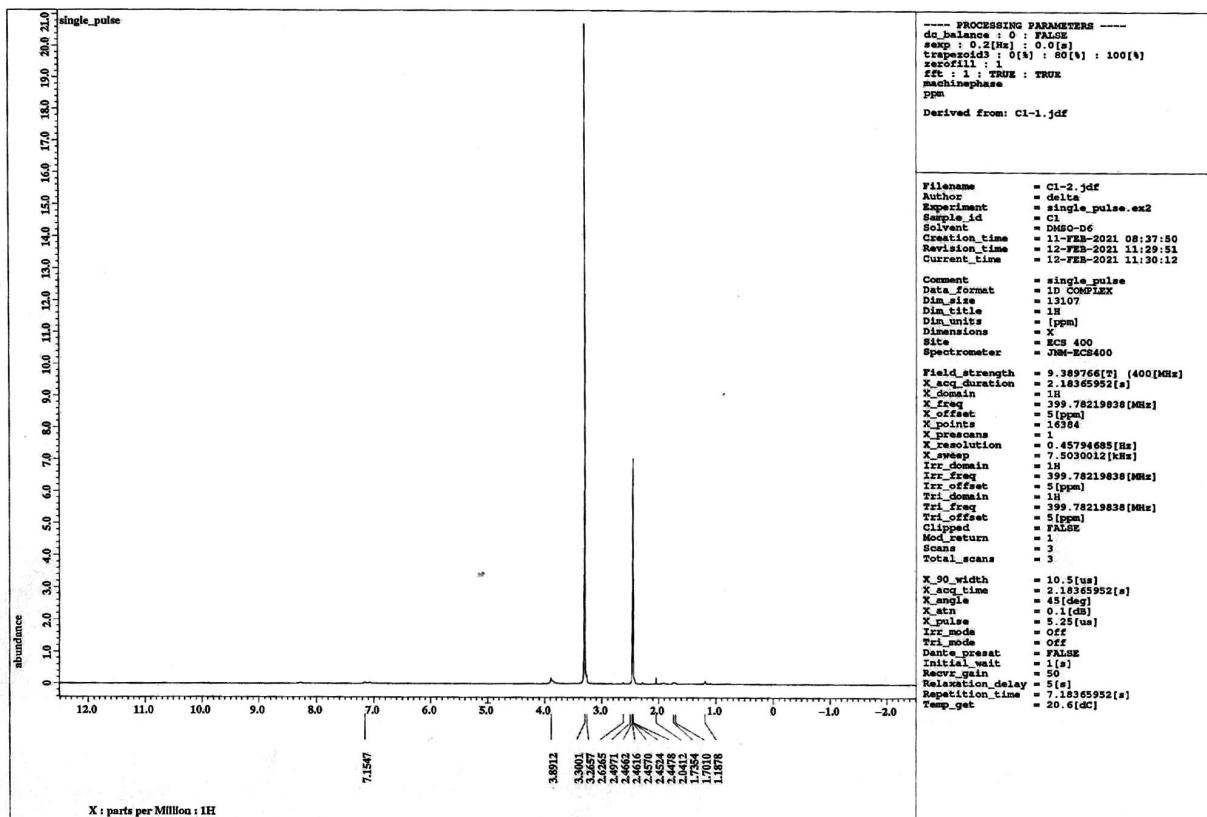Fig.S7 Representative  $^1\text{H}$  NMR spectra for the CP.

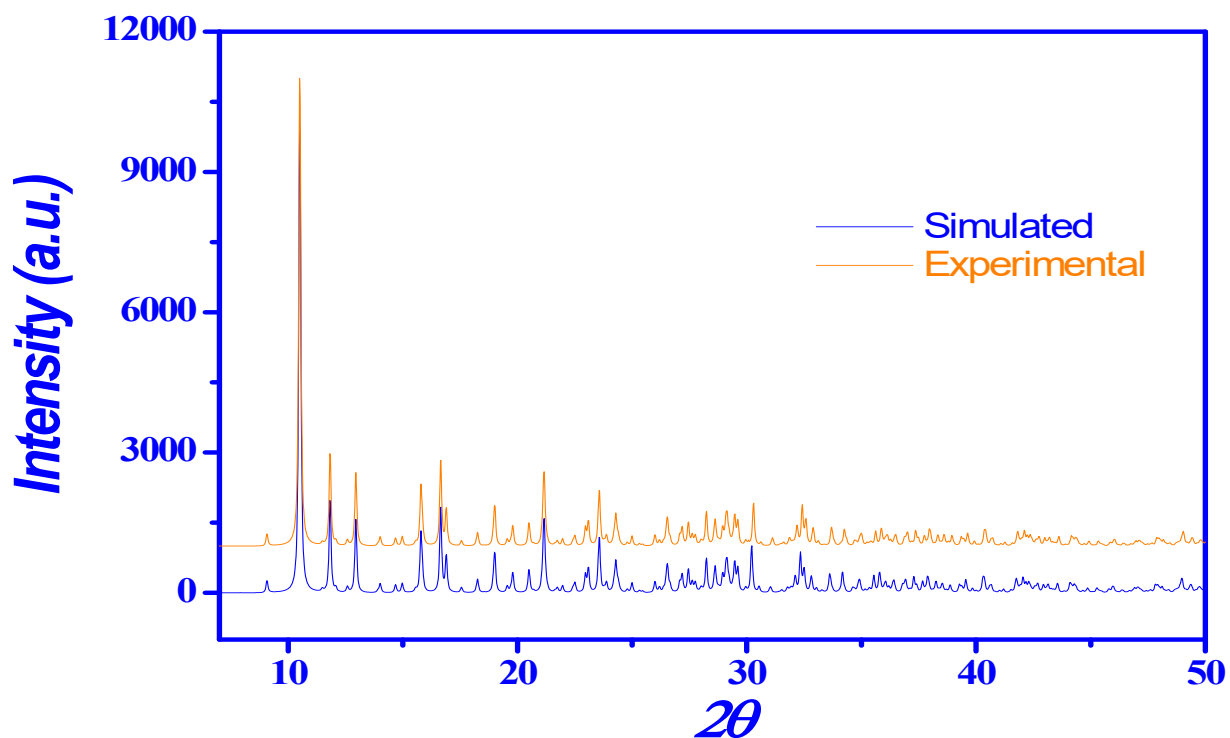

Fig.S8 Representative PXRD pattern for the CP.

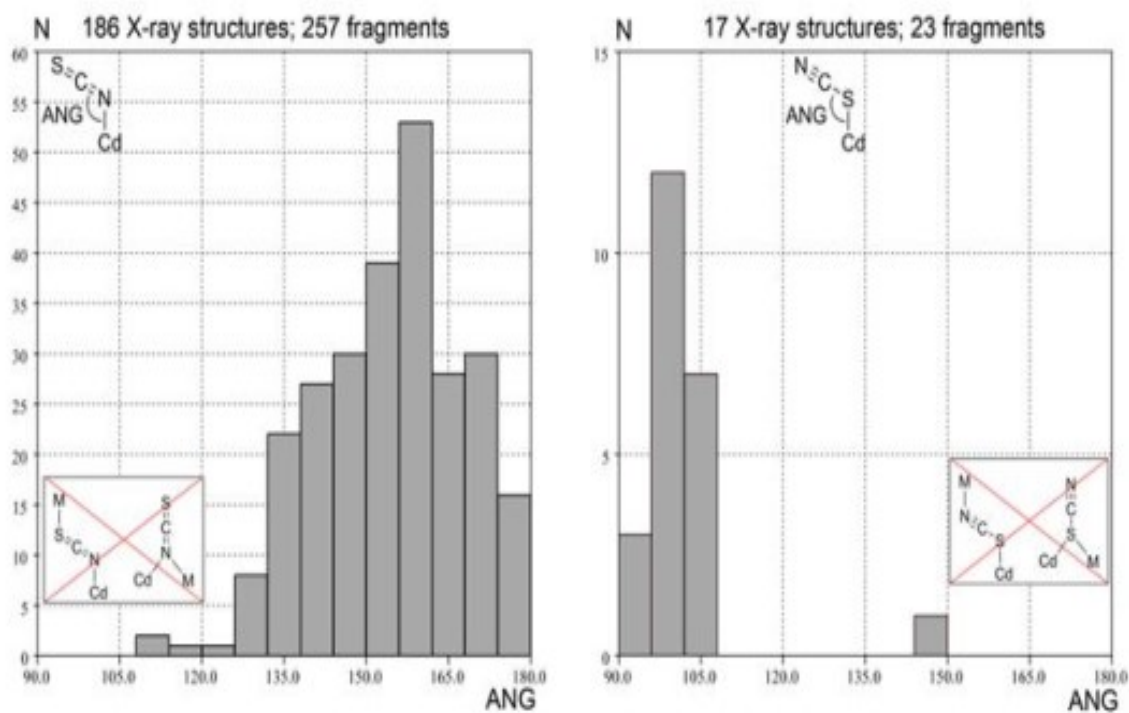

Fig.S9 Histogram plots of Cd-NC (left) and Cd-SC (right) angles in Cd-NCS and Cd-SCN complexes.



## References

- 1 J. H. Thurston, C. G. -Z. Tang, D.W. Trahan, and K. H. Whitmire, *Inorg. Chem.*, 2004, **43**, 2708–2713.
- 2 S. Bhattacharya, and S. Mohanta, *Inorg. Chim. Acta.*, 2015, **432**, 169–175.
- 3 A. Mustapha, K. Busch, M. Patykiewicz, A. Apedaile, J. Reglinski, A. R. Kennedy, and T. J. Prior, *Polyhedron*, 2008, **27**, 868–878.
- 4 J. Reglinski, S. Morris, and D. E. Stevenson, *Polyhedron*, 2002, **21**, 2167-2174.
- 5 S. Sarkar, and S. Mohanta, *RSC Adv.* 2011.
- 6 K. -J. Inoue, M. Ohba, and H. Okawa, *BCSJ.*, 2002, **75**, 99–107.
- 7 S. Roy, M. G. B. Drew, A. Bauzá, A. Frontera, and S. Chattopadhyay, *New J. Chem.*, 2018, **42**, 6062–6076.
- 8 S. Roy, A. Dey, M. G. B. Drew, P. P. Ray, and S. Chattopadhyay, *New J. Chem.*, 2019, **43**, 5020–5031.
- 9 S. Mirdya, S. Roy, S. Chatterjee, A. Bauzá, A. Frontera, and S. Chattopadhyay, *Cryst. Growth Des.*, 2019, **19**, 5869–5881.
- 10 G. Mahmoudi, D. A. Safin, M. P. Mitoraj, M. Amini, M. Kubicki, T. Doert, F. Locherer, and M. Fleck, *Inorg. Chem. Front.*, 2017, **4**, 171–182.
