# Supplementary material for: Synthesis, spectroscopic findings and crystal engineering of Pb(ii)–Salen coordination polymers, and supramolecular architectures engineered by σ-hole/spodium/tetrel bonds: a combined experimental and theoretical investigation
Source: PubMed Central journal article supplement — RSC Adv. 2022 Feb 24;12(10):6352–63. doi: 10.1039/d1ra09346k (PMC8982041; doi:10.1039/d1ra09346k), 2022-02-24

# Microanalysis Report

Prepared for: *Company Name Here*

Prepared by: *Your Name Here*

8/9/2021

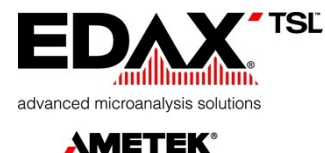

S1

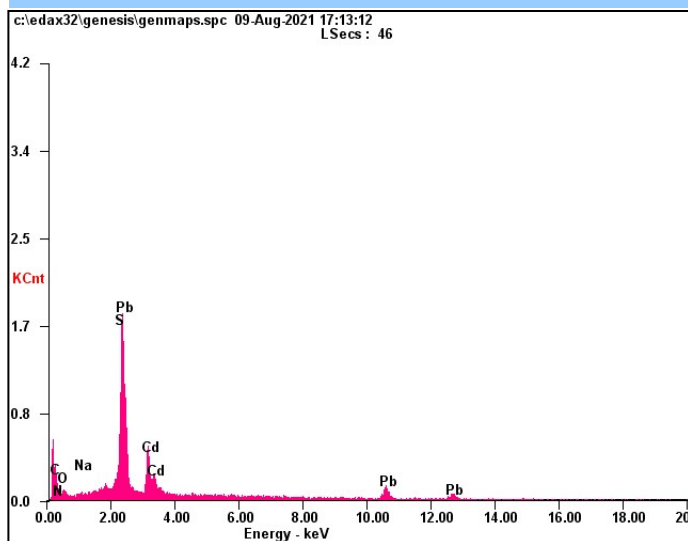

| <i>Element</i> | <i>Wt%</i> | <i>At%</i> |
|----------------|------------|------------|
| <i>CK</i>      | 38.99      | 64.63      |
| <i>NK</i>      | 11.97      | 17.01      |
| <i>OK</i>      | 06.86      | 08.54      |
| <i>NaK</i>     | 00.56      | 00.49      |
| <i>SK</i>      | 08.16      | 05.06      |
| <i>CdL</i>     | 13.01      | 02.30      |
| <i>PbL</i>     | 20.46      | 01.97      |
| <i>Matrix</i>  | Correction | ZAF        |

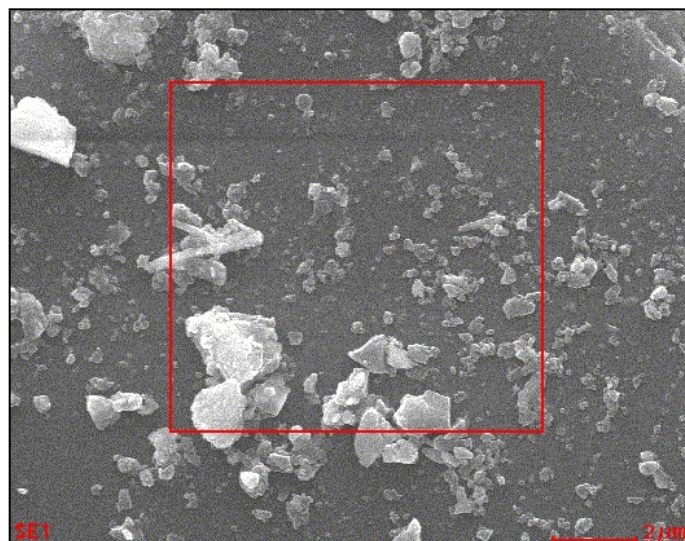

# Microanalysis Report

Prepared for: Company Name Here

Prepared by: Your Name Here

8/9/2021

S1

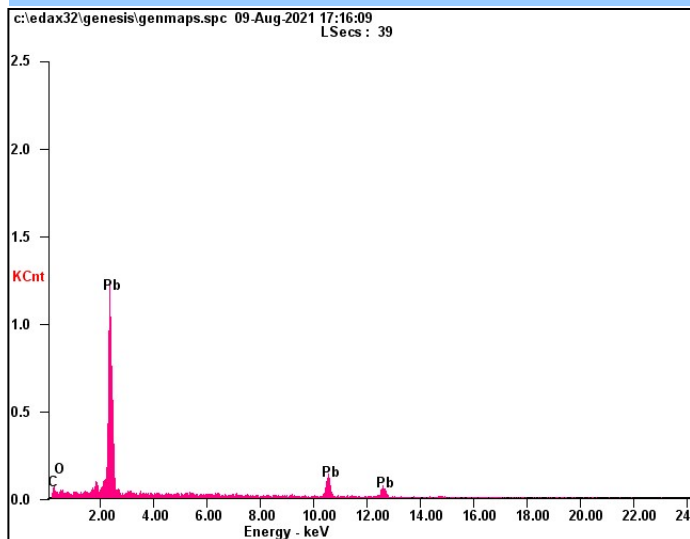

| Element | Wt%        | At%   |
|---------|------------|-------|
| CK      | 26.81      | 72.32 |
| OK      | 08.69      | 17.59 |
| PbL     | 64.50      | 10.09 |
| Matrix  | Correction | ZAF   |

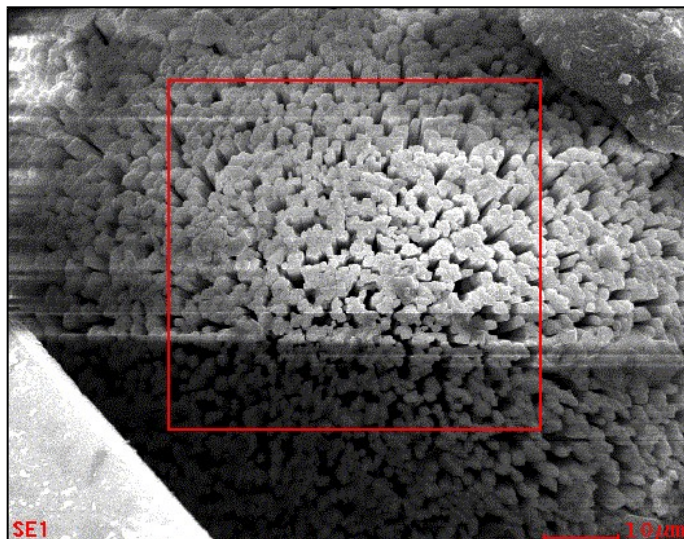

# Microanalysis Report

Prepared for: Company Name Here

Prepared by: Your Name Here

8/9/2021

S1

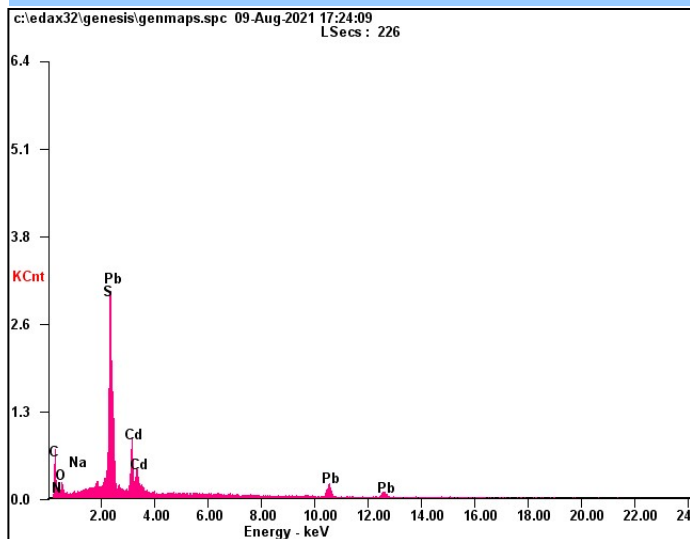

| Element | Wt%        | At%   |
|---------|------------|-------|
| CK      | 43.43      | 69.52 |
| NK      | 08.57      | 11.76 |
| OK      | 08.43      | 10.13 |
| NaK     | 00.17      | 00.14 |
| SK      | 07.47      | 04.48 |
| CdL     | 12.90      | 02.21 |
| PbL     | 19.04      | 01.77 |
| Matrix  | Correction | ZAF   |

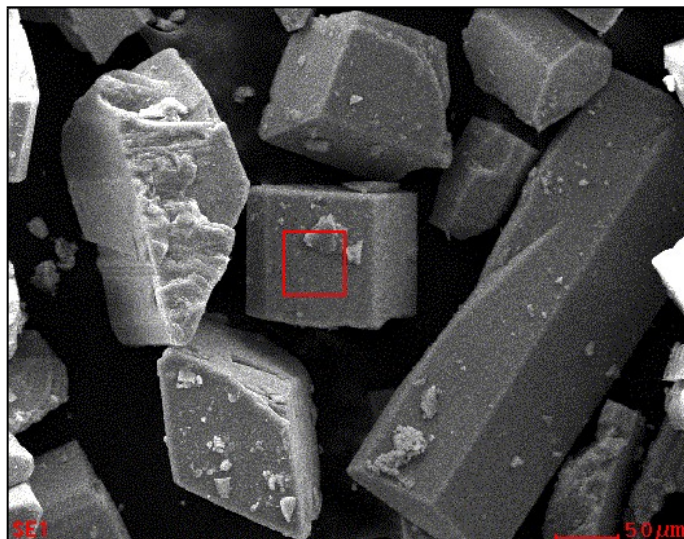

Supplement: RA-012-D1RA09346K-s003.pdf [file RA-012-D1RA09346K-s003.pdf]
