# Supplementary figures and images for: Synthesis, spectroscopic findings and crystal engineering of Pb(ii)–Salen coordination polymers, and supramolecular architectures engineered by σ-hole/spodium/tetrel bonds: a combined experimental and theoretical investigation
Source: PubMed Central journal article supplement — RSC Adv. 2022 Feb 24;12(10):6352–63. doi: 10.1039/d1ra09346k (PMC8982041; doi:10.1039/d1ra09346k), 2022-02-24

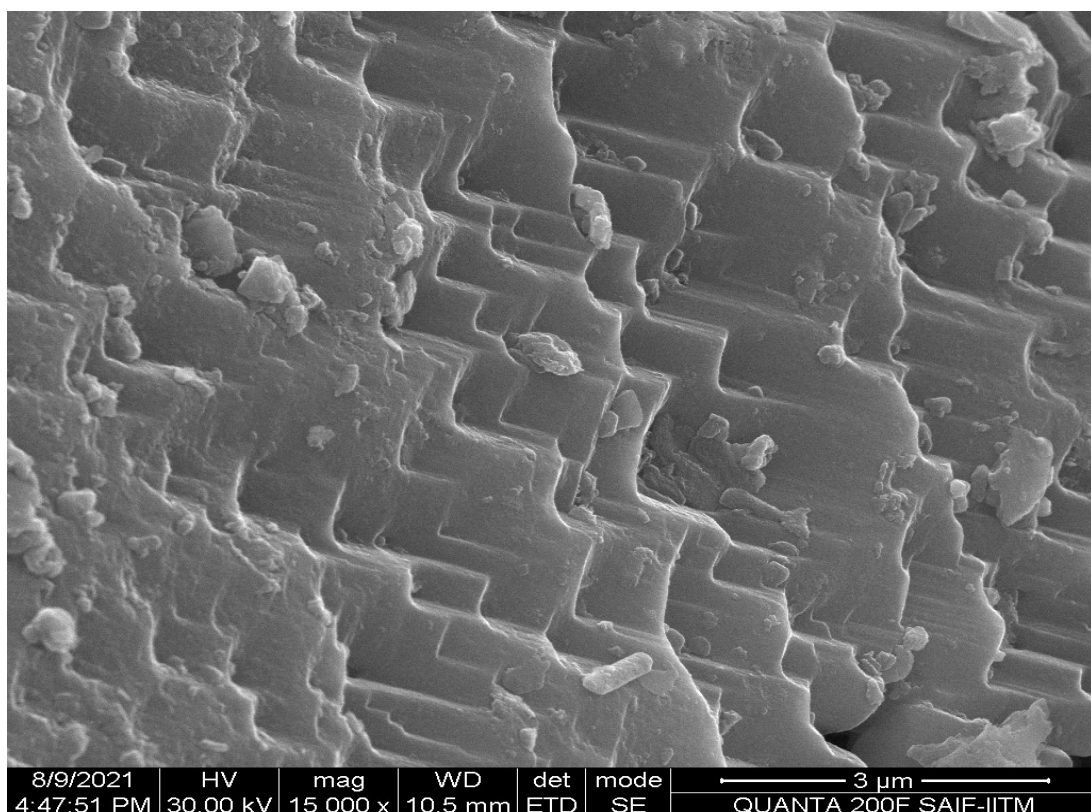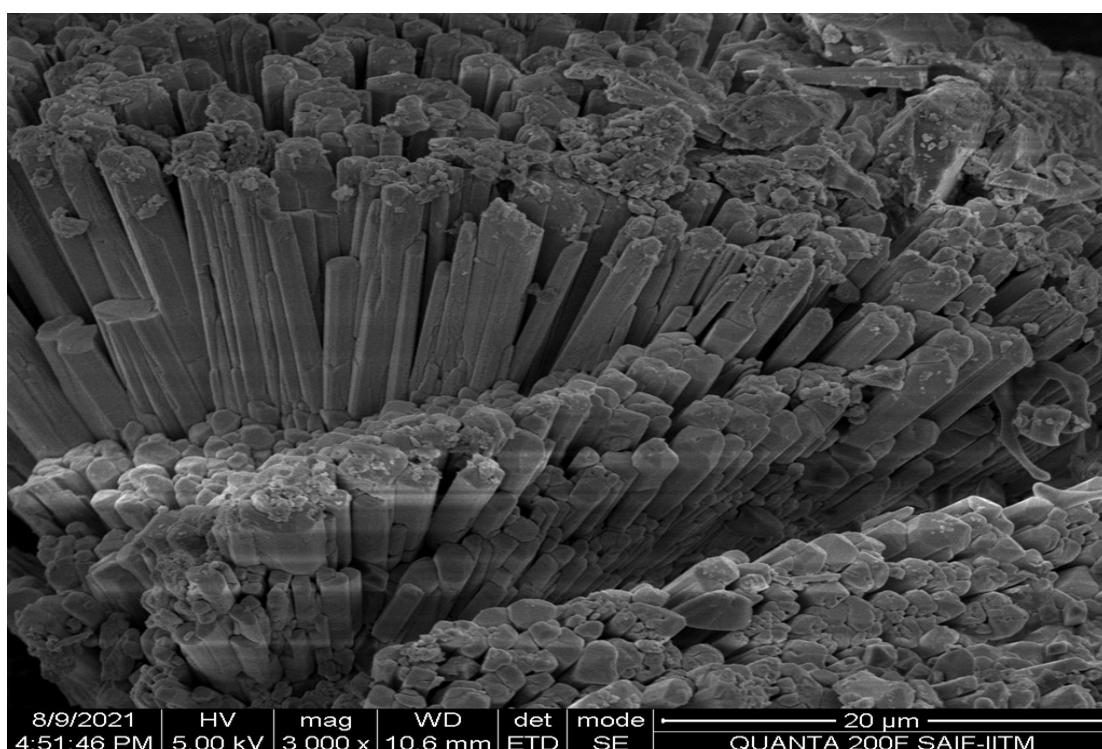

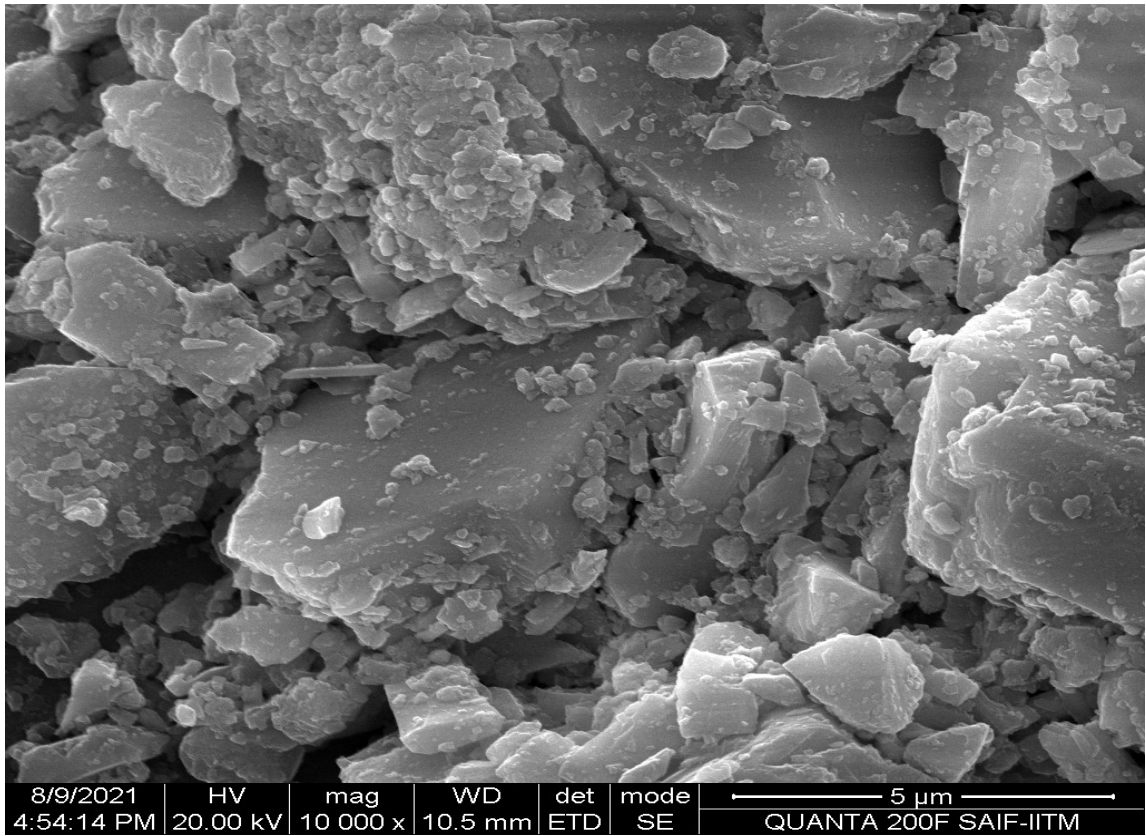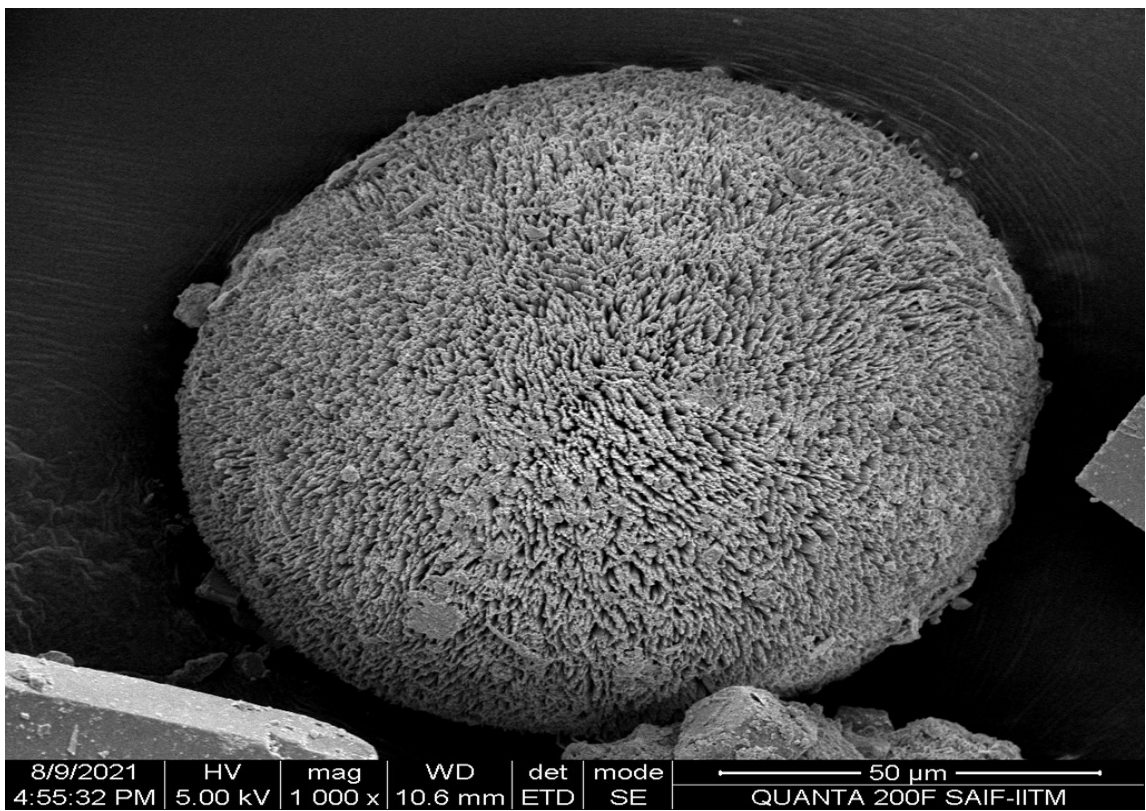

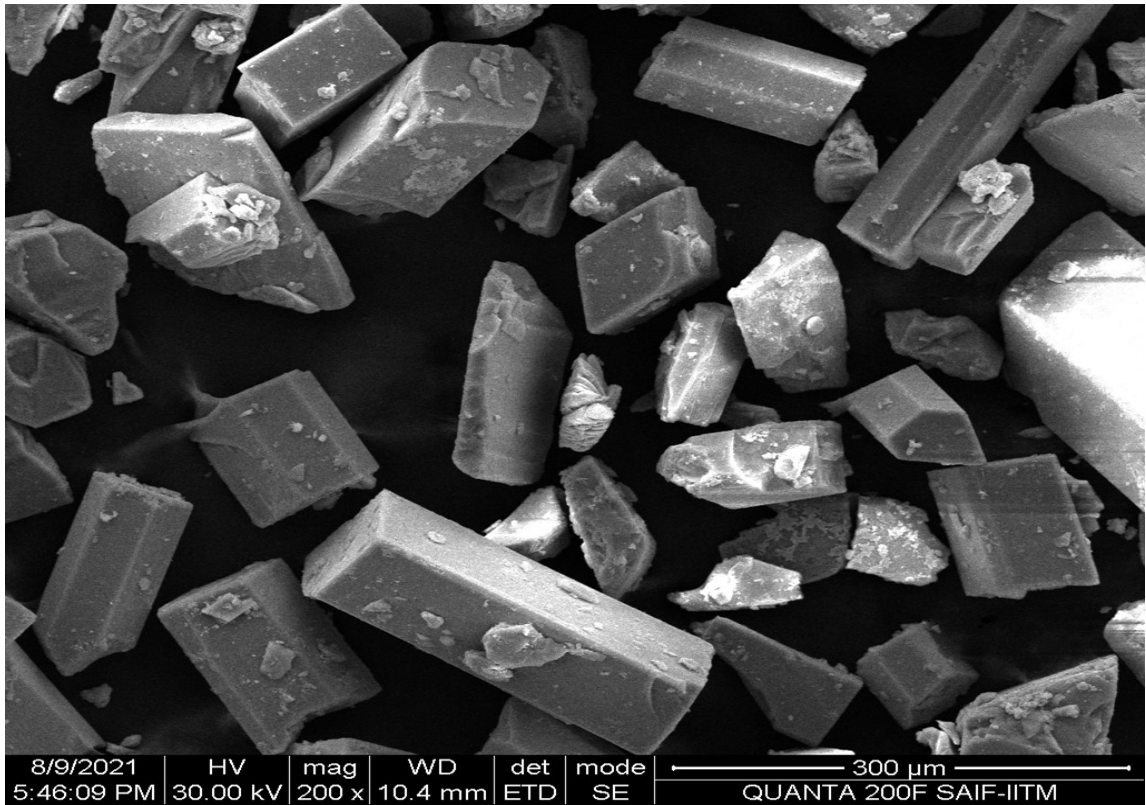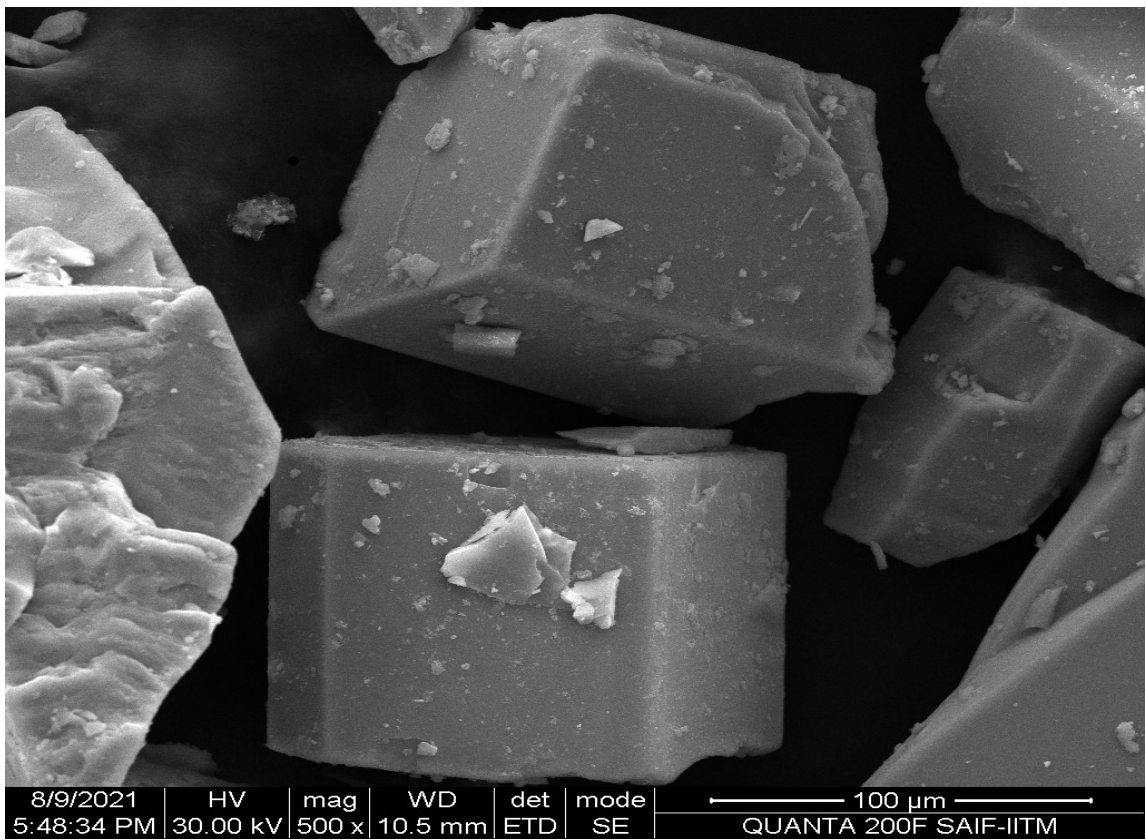

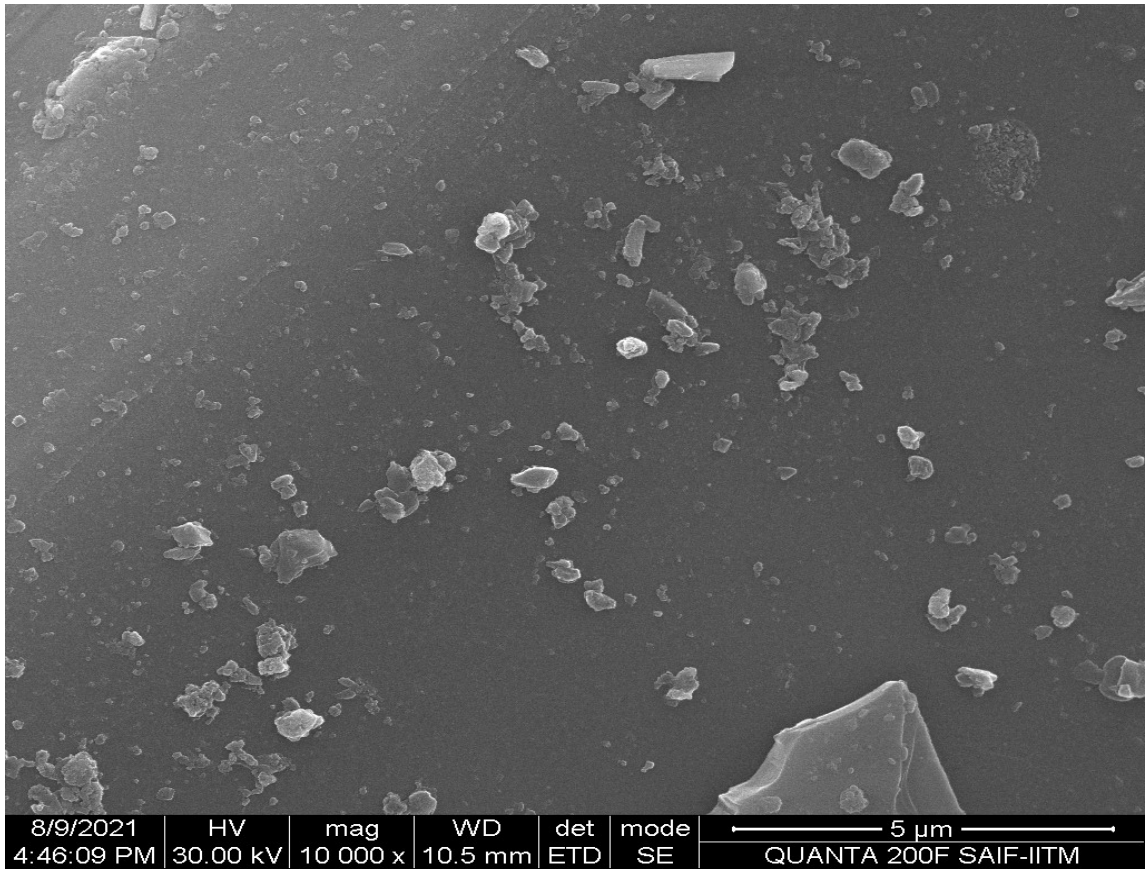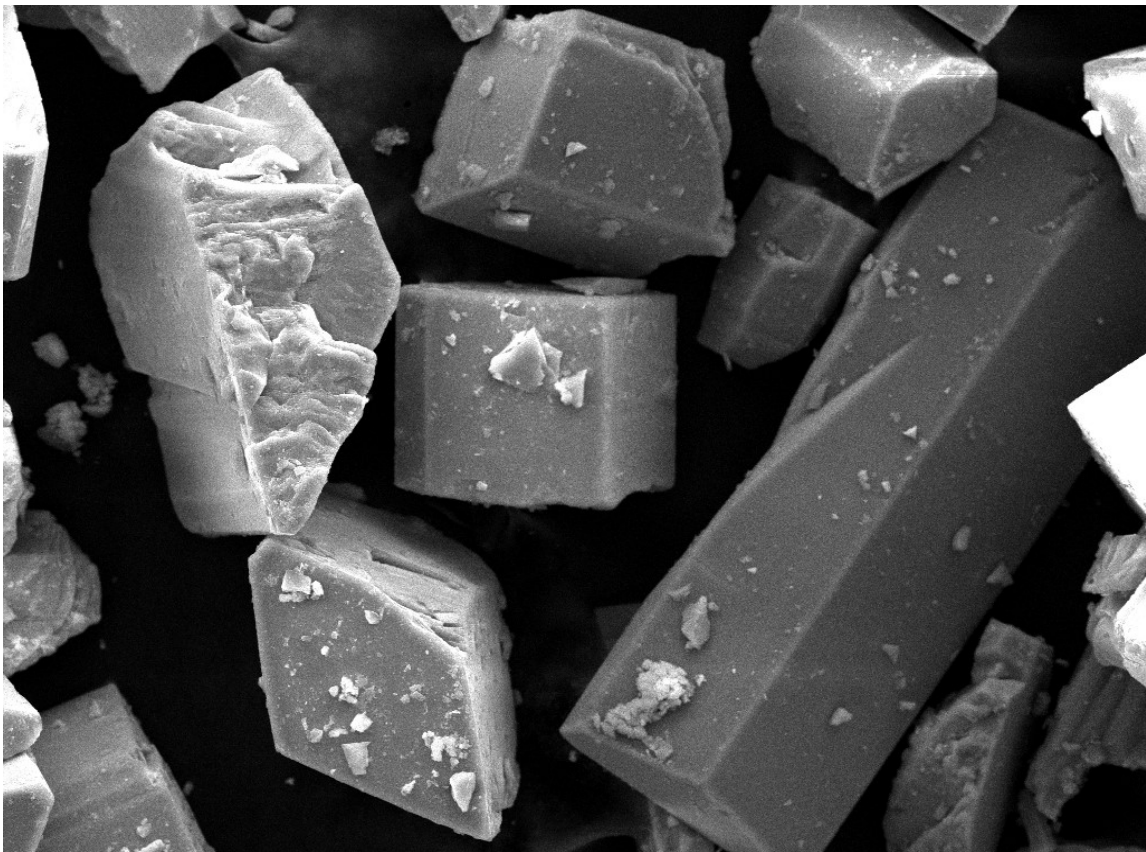

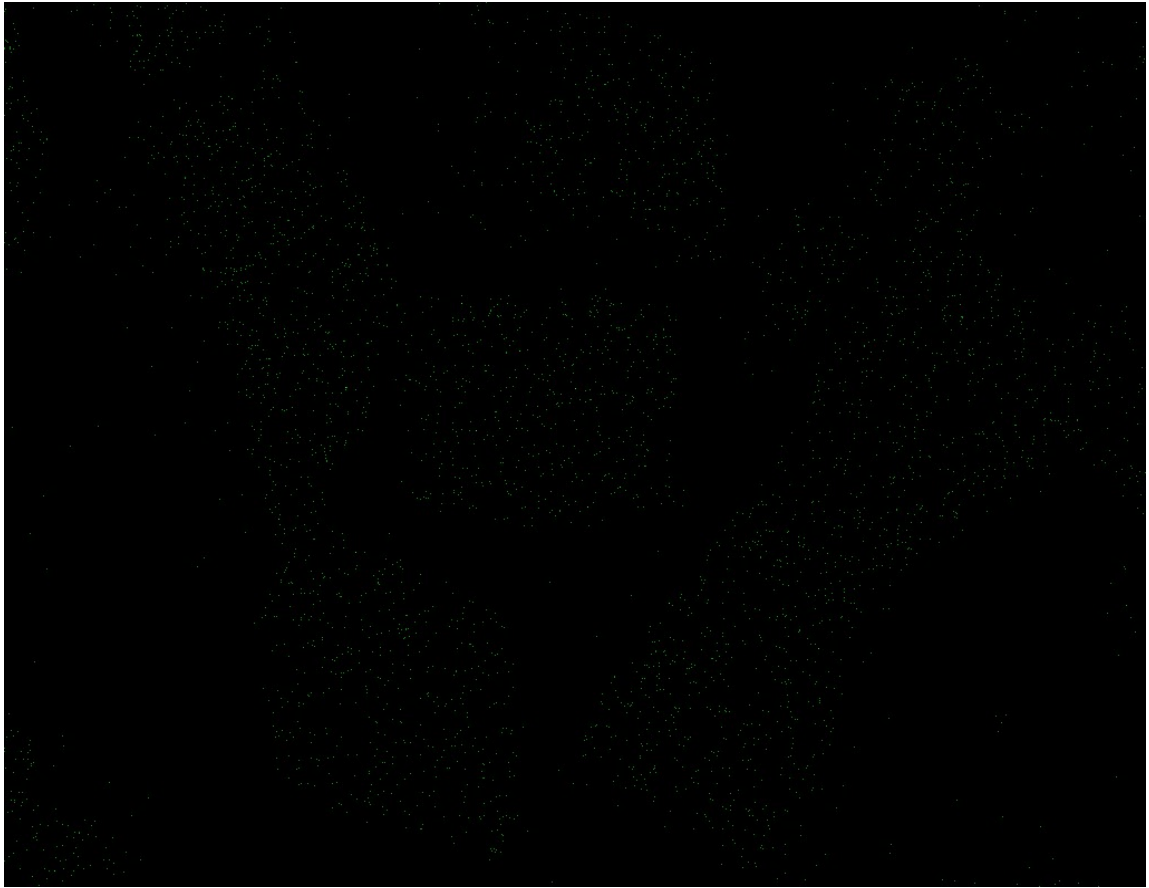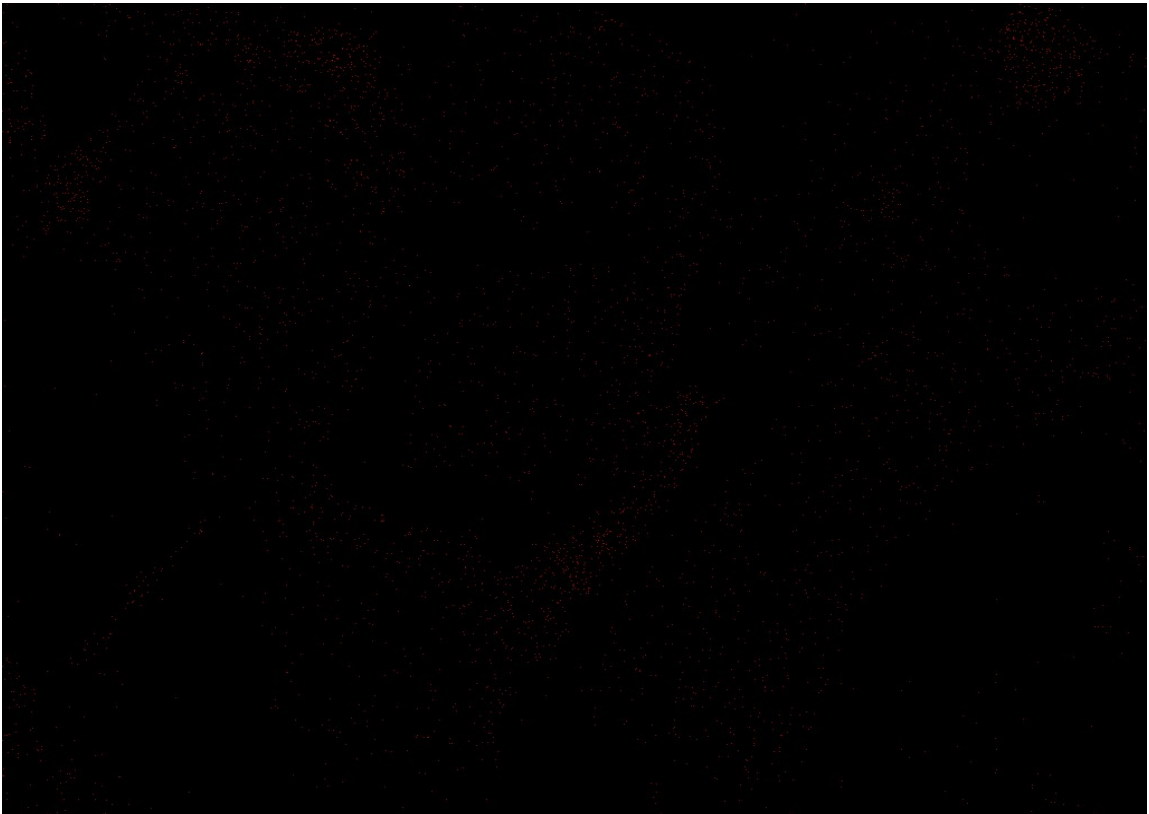

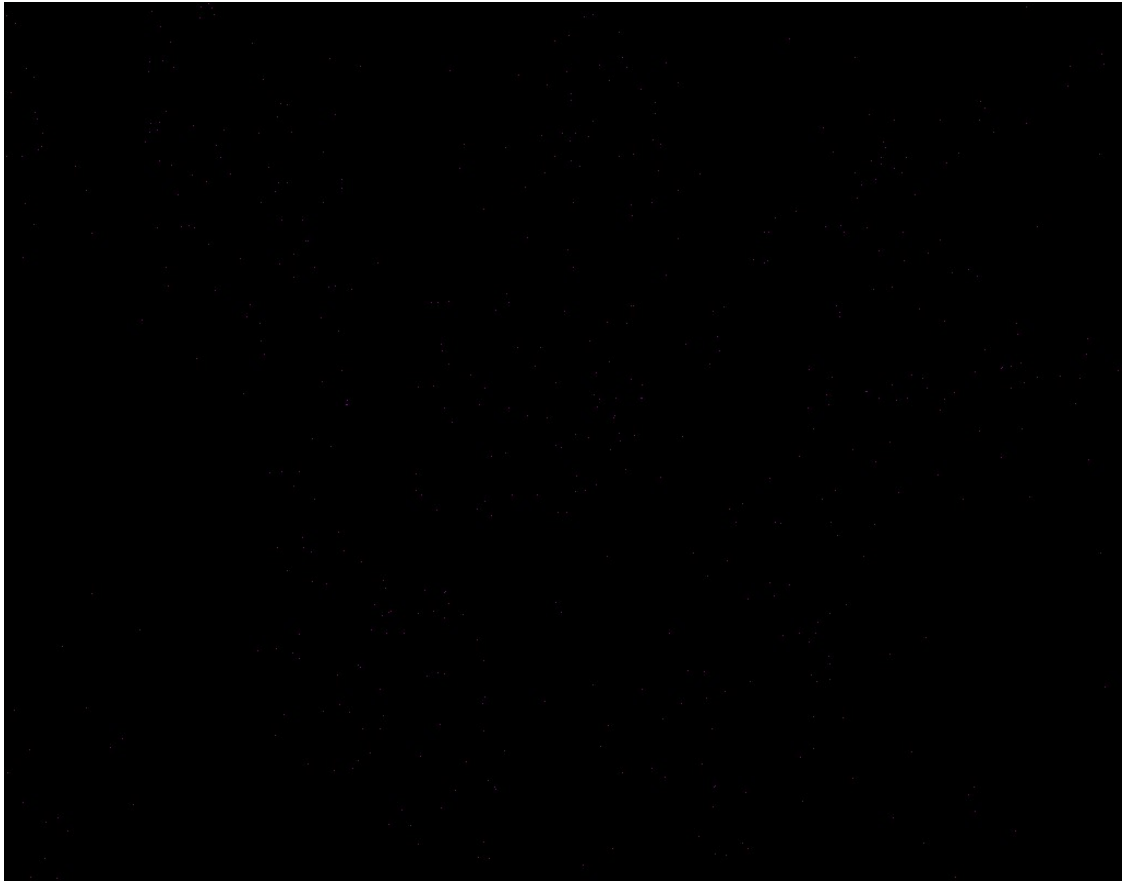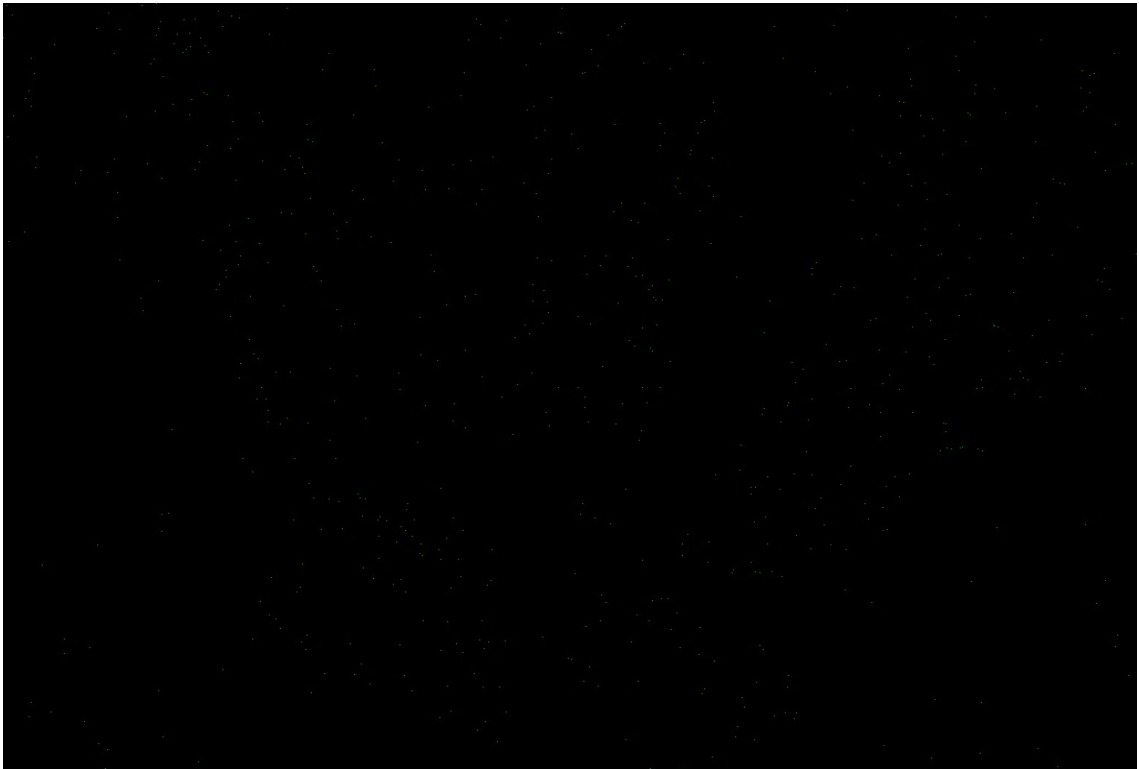

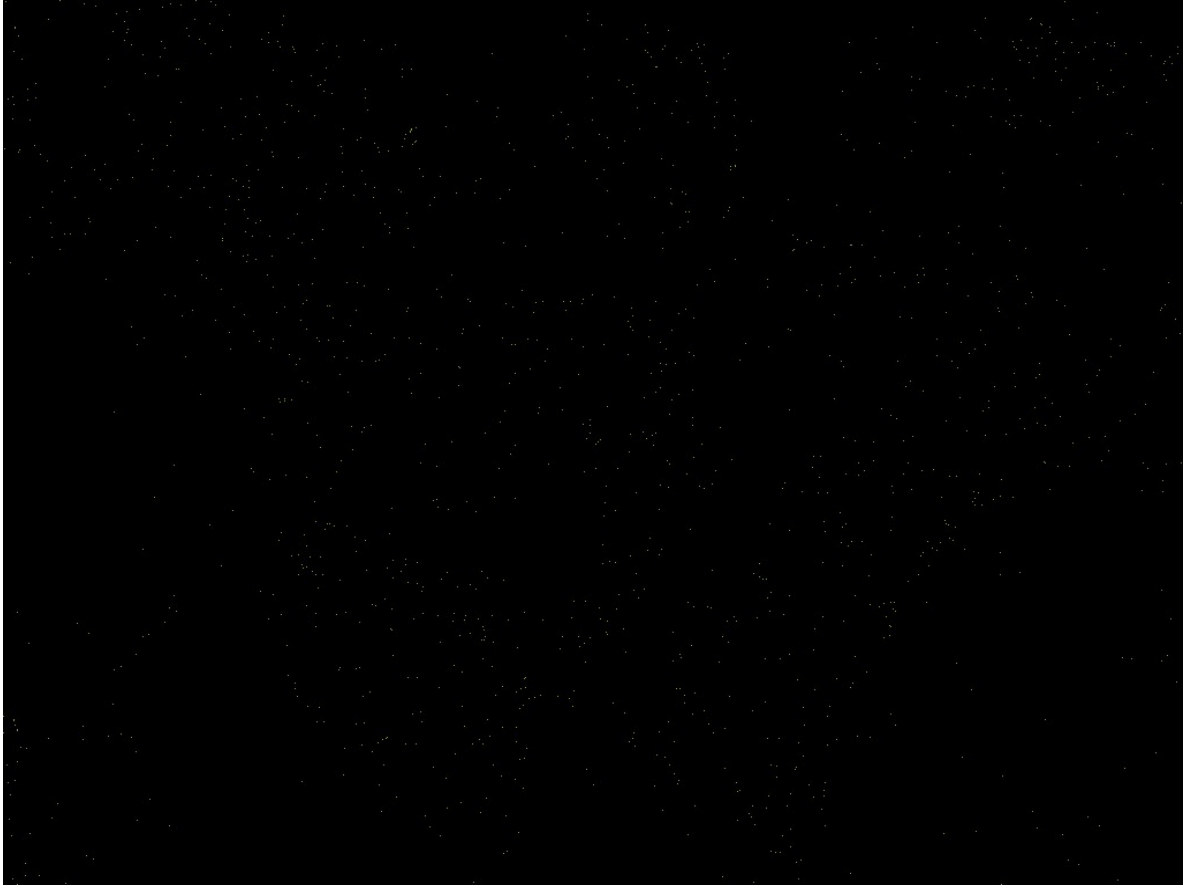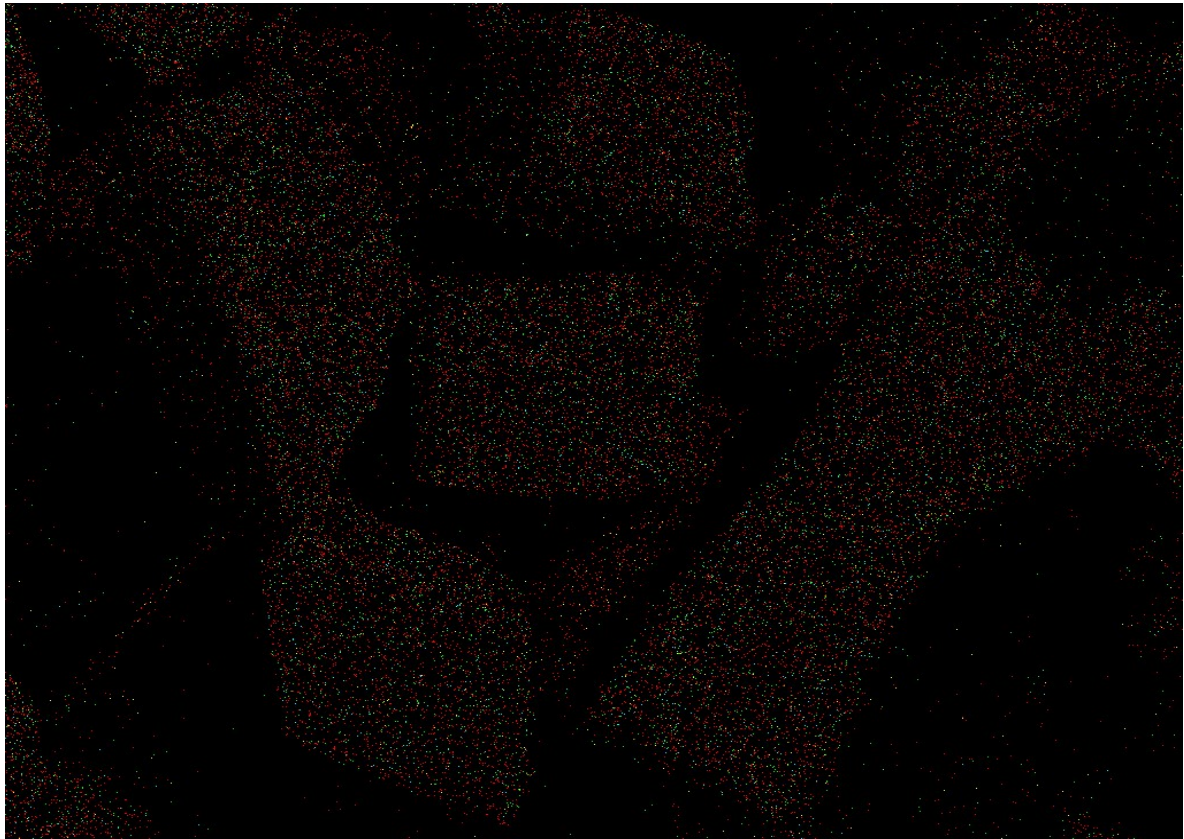

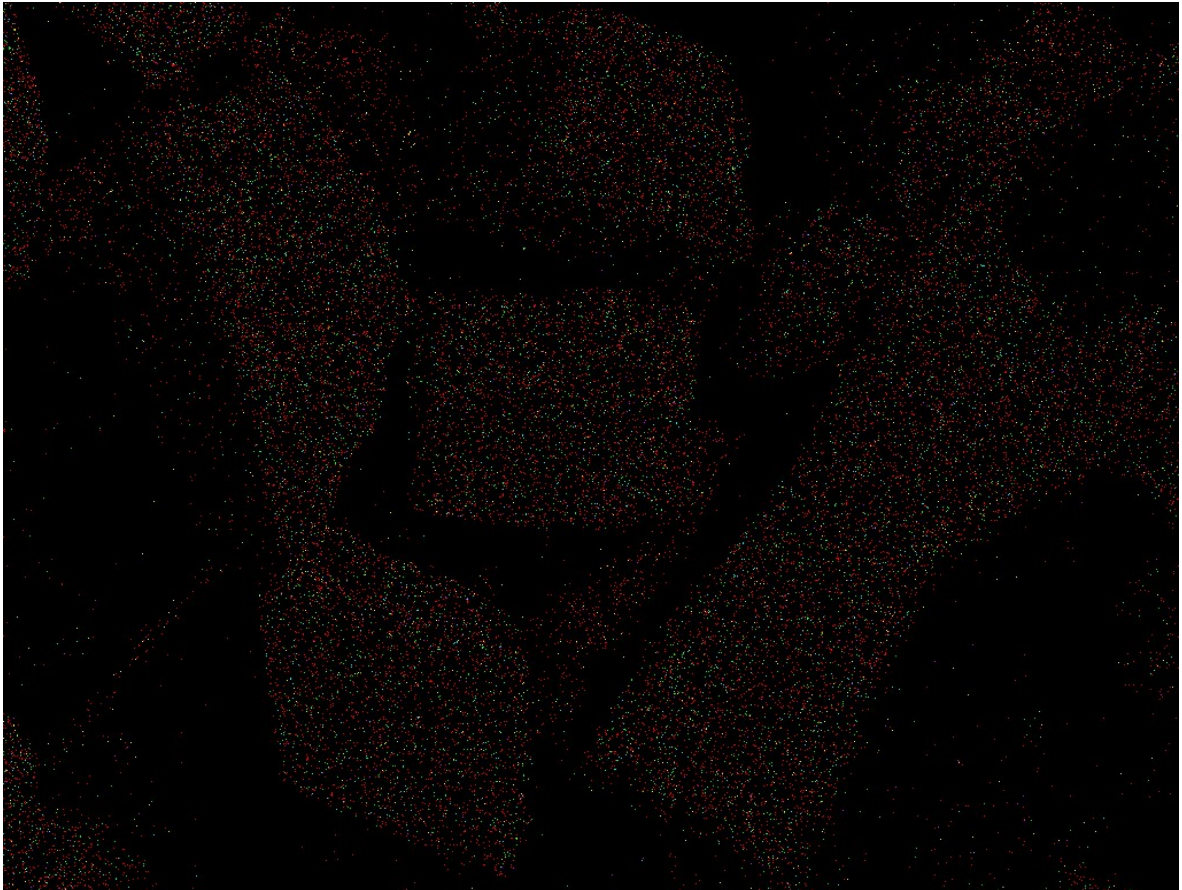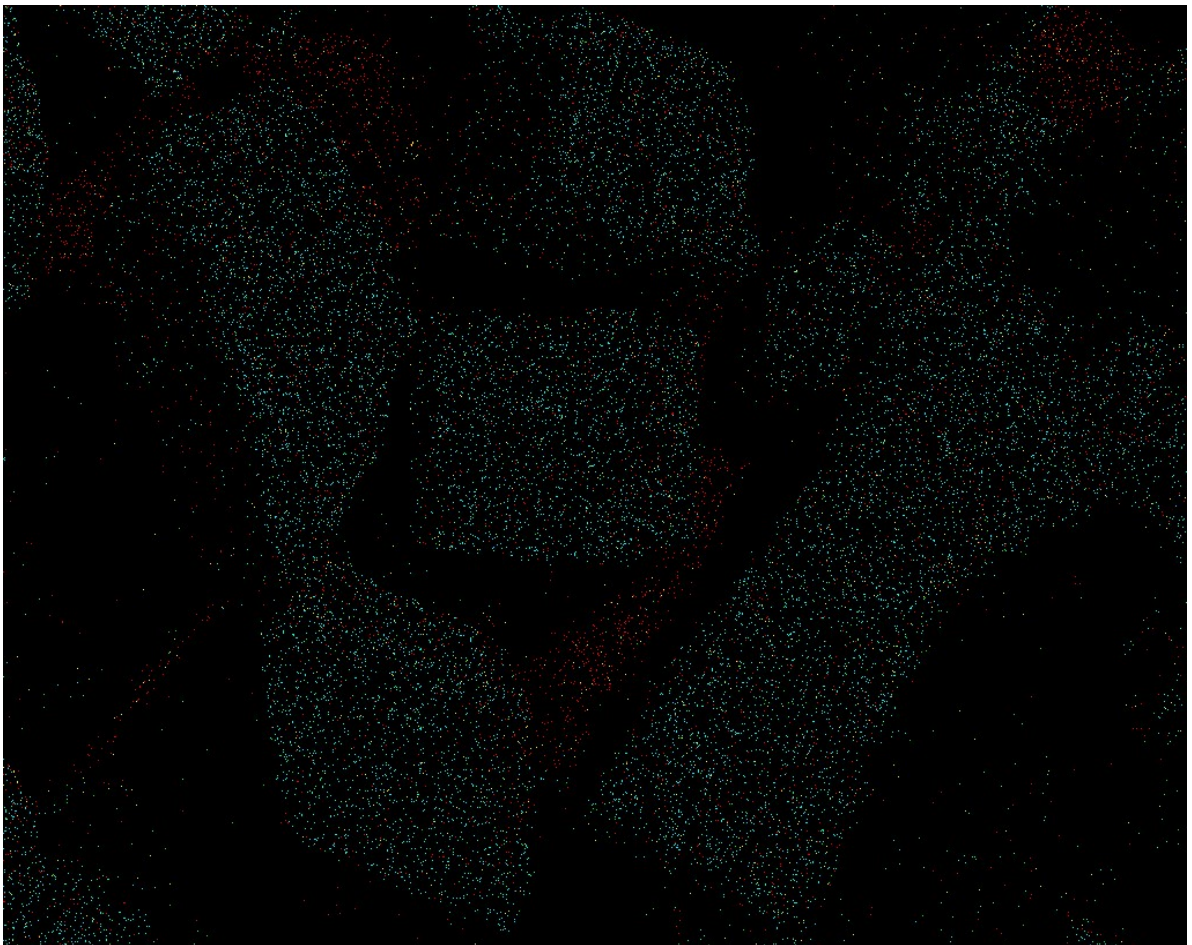



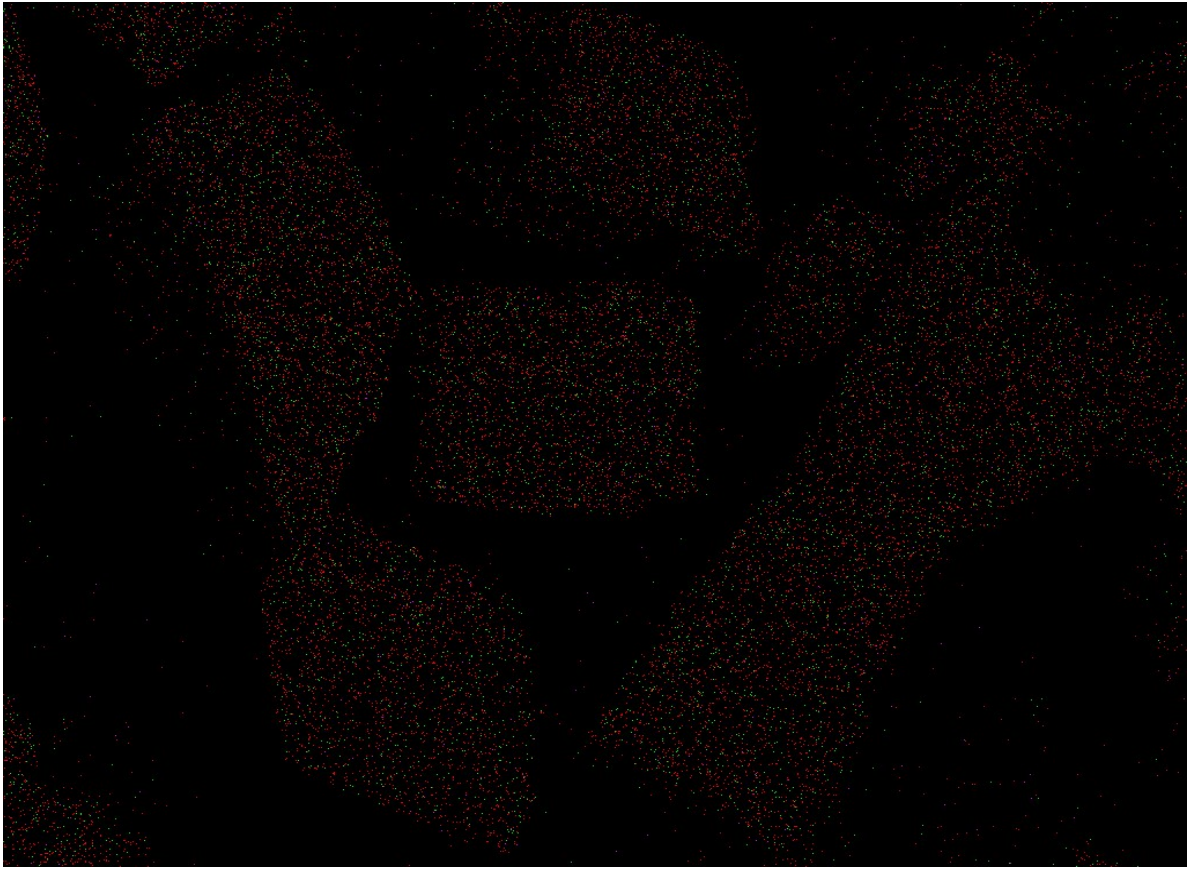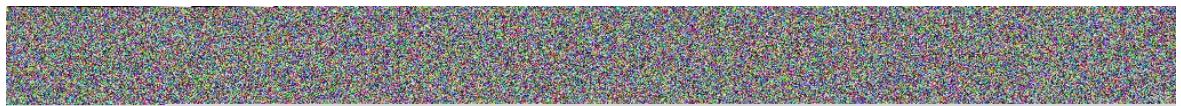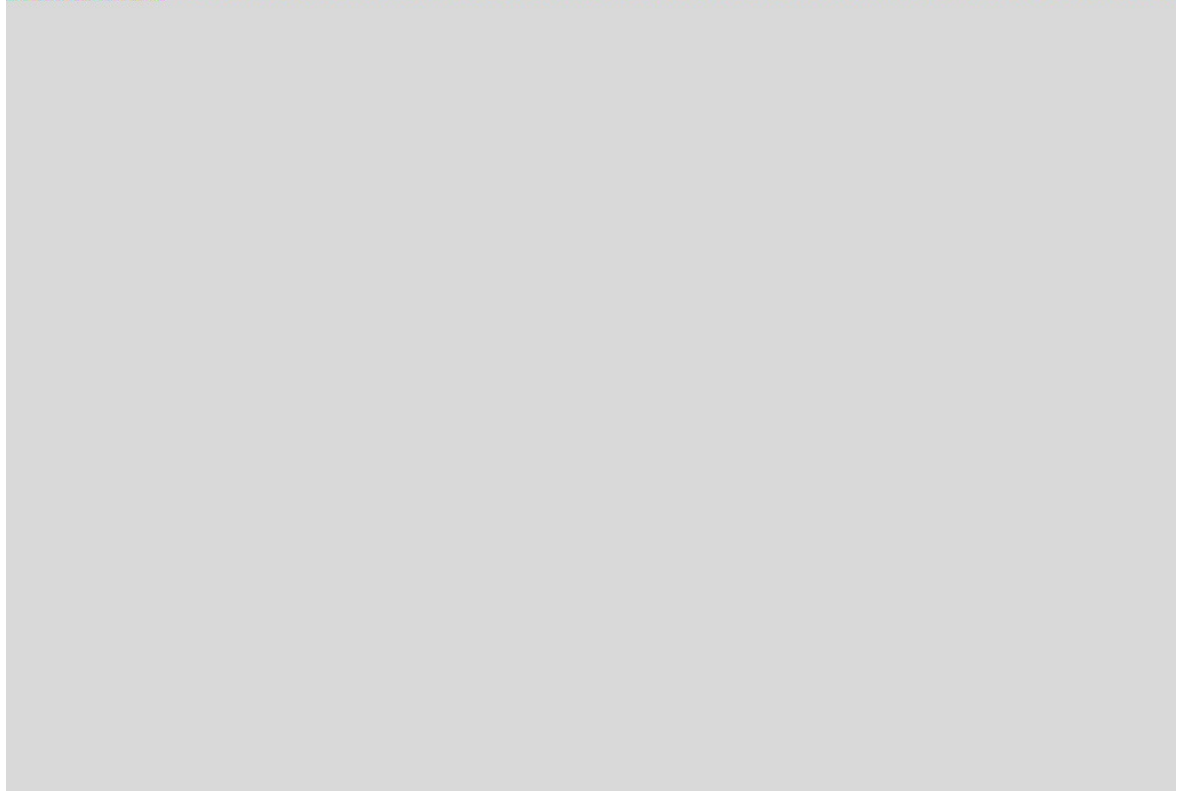

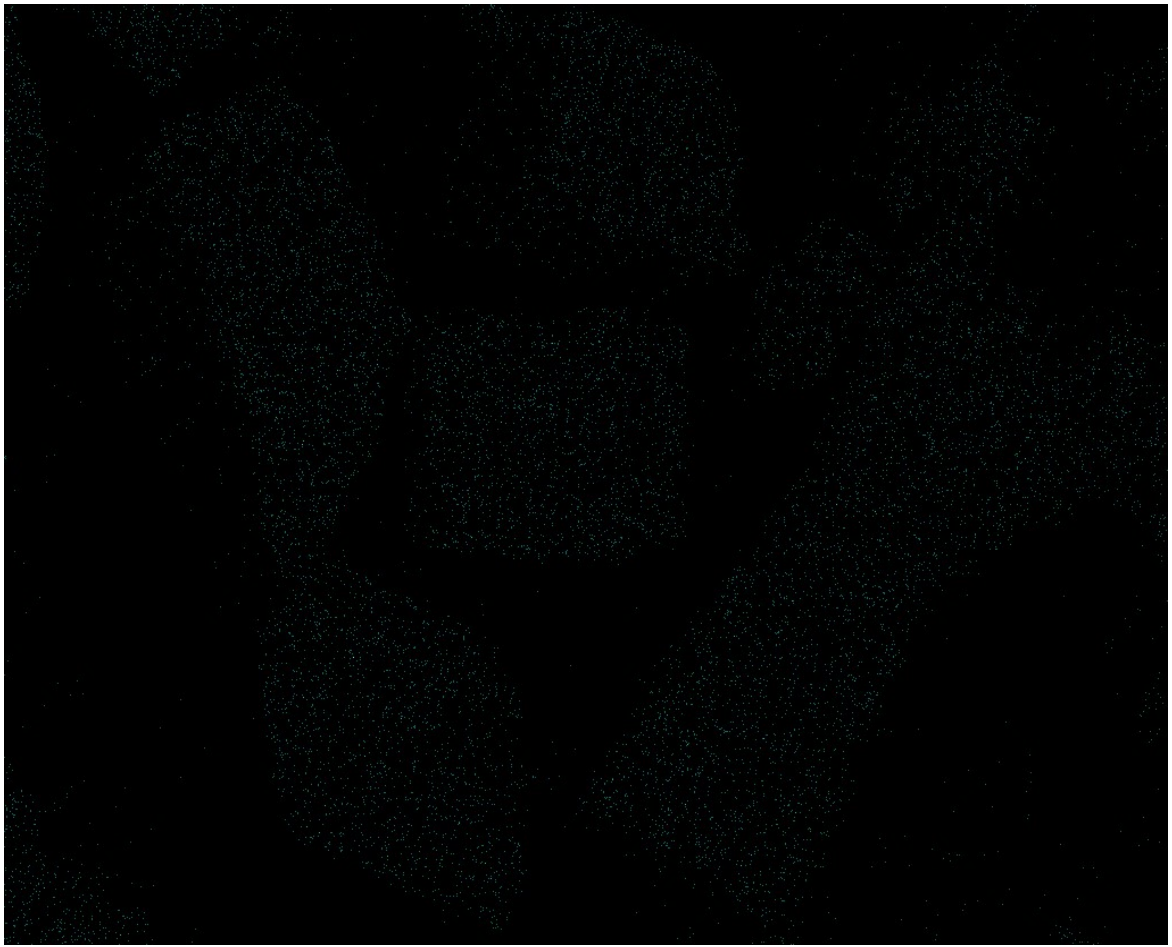

Supplement: RA-012-D1RA09346K-s001.pdf [file RA-012-D1RA09346K-s001.pdf]
